# Supplementary material for: Host Phenology and Geography as Drivers of Differentiation in Generalist Fungal Mycoparasites
Source: PubMed Central journal article supplement (PMC4372539; doi:10.1371/journal.pone.0120703), 2015-03-24
Supplement: pone.0120703.s005.pdf [file pone.0120703.s005.pdf]

**Dataset S1.** Designations of strains, their fungal host and host plant species of collection, and dates and places of collection of the *Ampelomyces* strains and powdery mildew-infected apple leaf samples bearing *Ampelomyces* mycoparasites included in this study. The 11 strains used to develop the microsatellite markers are shown in **red boldface**. Strains of *Ampelomyces* were designated with upper case letters and/or numbers. When more than one strain was isolated from the same site/plant, these were distinguished by lower case letters (e.g., B119-a and B119-b). If available, public culture collection designations of the strains are also shown. Lower case designations (b1-b365) were applied for apple leaf samples, preserved as herbarium materials and used in the microsatellite genotyping work. Dates and places of collections given with all known details. If several strains were used, collected from more than one site within a locality, or from more than one plant individual within one site, the site and/or the plant number was shown in the table. The identities of the host fungal and host plant species of the strains obtained from earlier works were determined by their suppliers.

| STRAIN / SAMPLE DESIGNATION (public culture collection designations in parentheses if applicable)  | HOST FUNGAL SPECIES      | HOST PLANT SPECIES           | DATE OF COLLECTION | PLACE OF COLLECTION             | GENBANK ACCESSION NUMBER OF THE nrDNA ITS SEQUENCE (reference in parentheses if determined in an earlier work) |
|----------------------------------------------------------------------------------------------------|--------------------------|------------------------------|--------------------|---------------------------------|----------------------------------------------------------------------------------------------------------------|
| <b><i>Ampelomyces</i> strains isolated from grass powdery mildew (<i>Blumeria graminis</i>)</b>    |                          |                              |                    |                                 |                                                                                                                |
| BgrA                                                                                               | <i>Blumeria graminis</i> | unknown grass                | 24 August 2009     | Brno, Czech Republic            |                                                                                                                |
| BgrB                                                                                               | <i>Blumeria graminis</i> | unknown grass                | 24 August 2009     | Brno, Czech Republic            |                                                                                                                |
| BgrC                                                                                               | <i>Blumeria graminis</i> | unknown grass                | 24 August 2009     | Brno, Czech Republic            |                                                                                                                |
| BgrD                                                                                               | <i>Blumeria graminis</i> | unknown grass                | 24 August 2009     | Brno, Czech Republic            |                                                                                                                |
| BgrE                                                                                               | <i>Blumeria graminis</i> | unknown grass                | 24 August 2009     | Brno, Czech Republic            |                                                                                                                |
| BgrF                                                                                               | <i>Blumeria graminis</i> | unknown grass                | 24 August 2009     | Brno, Czech Republic            |                                                                                                                |
| BgrG                                                                                               | <i>Blumeria graminis</i> | unknown grass                | 24 August 2009     | Brno, Czech Republic            |                                                                                                                |
| BgrH                                                                                               | <i>Blumeria graminis</i> | unknown grass                | 24 August 2009     | Brno, Czech Republic            |                                                                                                                |
| BgrI                                                                                               | <i>Blumeria graminis</i> | unknown grass                | 27 August 2009     | Rajec-Jestrecki, Czech Republic |                                                                                                                |
| KACC 43563                                                                                         | <i>Blumeria graminis</i> | <i>Diarrhena japonica</i>    | 2006               | Hongcheon, Korea                |                                                                                                                |
| KACC 44850                                                                                         | <i>Blumeria graminis</i> | <i>Agropyron</i> sp.         | 2009               | Brno, Czech Republic            |                                                                                                                |
| KACC 44851                                                                                         | <i>Blumeria graminis</i> | <i>Piptatherum virescens</i> | 2009               | Brno, Czech Republic            |                                                                                                                |
| <b><i>Ampelomyces</i> strains isolated from grapevine powdery mildew (<i>Erysiphe necator</i>)</b> |                          |                              |                    |                                 |                                                                                                                |
| Vitis42                                                                                            | <i>Erysiphe necator</i>  | <i>Vitis vinifera</i>        | 14 Oct. 2009       | Paterno, Italy                  | JN417725 (Pintye et al. 2012)                                                                                  |
| Vitis55                                                                                            | <i>Erysiphe necator</i>  | <i>Vitis vinifera</i>        | 15 Oct. 2009       | Santo Stefano, Italy            | JN417732 (Pintye et al. 2012)                                                                                  |
| Vitis56                                                                                            | <i>Erysiphe necator</i>  | <i>Vitis vinifera</i>        | 17 Oct. 2009       | Santo Stefano, Italy            | JN417733 (Pintye et al. 2012)                                                                                  |
| Vitis60                                                                                            | <i>Erysiphe necator</i>  | <i>Vitis vinifera</i>        | 17 Oct. 2009       | Santo Stefano, Italy            | JN417734 (Pintye et al. 2012)                                                                                  |
| Vitis70 (CBS 132220)                                                                               | <i>Erysiphe necator</i>  | <i>Vitis vinifera</i>        | 16 Oct. 2009       | Jesi, Italy                     | JN417739 (Pintye et al. 2012)                                                                                  |
| Vitis71                                                                                            | <i>Erysiphe necator</i>  | <i>Vitis vinifera</i>        | 16 Oct. 2009       | Jesi, Italy                     |                                                                                                                |
| Vitis72                                                                                            | <i>Erysiphe necator</i>  | <i>Vitis vinifera</i>        | 16 Oct. 2009       | Portonovo, Italy                | JN417740 (Pintye et al. 2012)                                                                                  |
| Vitis76                                                                                            | <i>Erysiphe necator</i>  | <i>Vitis vinifera</i>        | 16 Oct. 2009       | Portonovo, Italy                | JN417742 (Pintye et al. 2012)                                                                                  |
| Vitis79                                                                                            | <i>Erysiphe necator</i>  | <i>Vitis vinifera</i>        | 16 Oct. 2009       | Portonovo, Italy                | JN417743 (Pintye et al. 2012)                                                                                  |

|                    |                         |                       |               |                    |                               |
|--------------------|-------------------------|-----------------------|---------------|--------------------|-------------------------------|
| Vitis81            | <i>Erysiphe necator</i> | <i>Vitis vinifera</i> | 22 Oct. 2009  | Szekszárd, Hungary | JN417744 (Pintye et al. 2012) |
| Vitis98            | <i>Erysiphe necator</i> | <i>Vitis vinifera</i> | 28 Sept. 2009 | Budapest, Hungary  | JN417748 (Pintye et al. 2012) |
| Vitis107           | <i>Erysiphe necator</i> | <i>Vitis vinifera</i> | 22 Sept. 2009 | Eger, Hungary      | JN417752 (Pintye et al. 2012) |
| Vitis113           | <i>Erysiphe necator</i> | <i>Vitis vinifera</i> | 22 Sept. 2009 | Eger, Hungary      | JN417754 (Pintye et al. 2012) |
| Vitis115           | <i>Erysiphe necator</i> | <i>Vitis vinifera</i> | 22 Sept. 2009 | Eger, Hungary      | JN417756 (Pintye et al. 2012) |
| Vitis117           | <i>Erysiphe necator</i> | <i>Vitis vinifera</i> | 22 Sept. 2009 | Eger, Hungary      | JN417757 (Pintye et al. 2012) |
| G273 (ATCC200245)  | <i>Erysiphe necator</i> | <i>Vitis</i> sp.      | 1989          | Geneva, NY, USA    | HM125018 (Kiss et al. 2011)   |
| SF423 (ATCC200250) | <i>Erysiphe necator</i> | <i>Vitis riparia</i>  | 1991          | Geneva, NY, USA    | HM125017 (Kiss et al. 2011)   |

***Ampelomyces* strains isolated from *Arthrocladiella mougeotii* infecting *Lycium halimifolium***

|                        |                                  |                            |               |                                   |                             |
|------------------------|----------------------------------|----------------------------|---------------|-----------------------------------|-----------------------------|
| <b>A1 (ATCC201056)</b> | <i>Arthrocladiella mougeotii</i> | <i>Lycium halimifolium</i> | 1990          | Hungary                           |                             |
| A8                     | <i>Arthrocladiella mougeotii</i> | <i>Lycium halimifolium</i> | 14 Sept. 2007 | Site 1, bush 1, Budapest, Hungary | HM124894 (Kiss et al. 2011) |
| A10-a                  | <i>Arthrocladiella mougeotii</i> | <i>Lycium halimifolium</i> | 14 Sept. 2007 | Site 1, bush 1, Budapest, Hungary | HM124896 (Kiss et al. 2011) |
| A10-c                  | <i>Arthrocladiella mougeotii</i> | <i>Lycium halimifolium</i> | 14 Sept. 2007 | Site 1, bush 1, Budapest, Hungary |                             |
| A11-a                  | <i>Arthrocladiella mougeotii</i> | <i>Lycium halimifolium</i> | 14 Sept. 2007 | Site 1, bush 2, Budapest, Hungary | HM124897 (Kiss et al. 2011) |
| A11-b                  | <i>Arthrocladiella mougeotii</i> | <i>Lycium halimifolium</i> | 14 Sept. 2007 | Site 1, bush 2, Budapest, Hungary |                             |
| A11-c                  | <i>Arthrocladiella mougeotii</i> | <i>Lycium halimifolium</i> | 14 Sept. 2007 | Site 1, bush 2, Budapest, Hungary |                             |
| A12-a                  | <i>Arthrocladiella mougeotii</i> | <i>Lycium halimifolium</i> | 19 Sept. 2007 | Site 1, bush 1, Budapest, Hungary | HM124898 (Kiss et al. 2011) |
| A12-c                  | <i>Arthrocladiella mougeotii</i> | <i>Lycium halimifolium</i> | 19 Sept. 2007 | Site 1, bush 1, Budapest, Hungary |                             |
| A13-a                  | <i>Arthrocladiella mougeotii</i> | <i>Lycium halimifolium</i> | 19 Sept. 2007 | Site 1, bush 1, Budapest, Hungary |                             |
| A13-b                  | <i>Arthrocladiella mougeotii</i> | <i>Lycium halimifolium</i> | 19 Sept. 2007 | Site 1, bush 1, Budapest, Hungary |                             |
| A13-c                  | <i>Arthrocladiella mougeotii</i> | <i>Lycium halimifolium</i> | 19 Sept. 2007 | Site 1, bush 1, Budapest, Hungary |                             |
| A14-a                  | <i>Arthrocladiella mougeotii</i> | <i>Lycium halimifolium</i> | 19 Sept. 2007 | Site 1, bush 1, Budapest, Hungary | HM124899 (Kiss et al. 2011) |
| A14-b                  | <i>Arthrocladiella mougeotii</i> | <i>Lycium halimifolium</i> | 19 Sept. 2007 | Site 1, bush 1, Budapest, Hungary |                             |
| A14-c                  | <i>Arthrocladiella mougeotii</i> | <i>Lycium halimifolium</i> | 19 Sept. 2007 | Site 1, bush 1, Budapest, Hungary |                             |
| A14-d                  | <i>Arthrocladiella mougeotii</i> | <i>Lycium halimifolium</i> | 19 Sept. 2007 | Site 1, bush 1, Budapest, Hungary |                             |
| A15-a                  | <i>Arthrocladiella mougeotii</i> | <i>Lycium halimifolium</i> | 21 Sept. 2007 | Site 1, bush 1, Budapest, Hungary | HM124900 (Kiss et al. 2011) |
| A17                    | <i>Arthrocladiella mougeotii</i> | <i>Lycium halimifolium</i> | 21 Sept. 2007 | Site 1, bush 1, Budapest, Hungary | HM124901 (Kiss et al. 2011) |
| A18-a                  | <i>Arthrocladiella mougeotii</i> | <i>Lycium halimifolium</i> | 14 Sept. 2007 | Site 2, bush 1, Budapest, Hungary | HM124902 (Kiss et al. 2011) |
| A19-a                  | <i>Arthrocladiella mougeotii</i> | <i>Lycium halimifolium</i> | 11 Oct. 2007  | Site 2, bush 2, Budapest, Hungary | HM124903 (Kiss et al. 2011) |
| A19-b                  | <i>Arthrocladiella mougeotii</i> | <i>Lycium halimifolium</i> | 11 Oct. 2007  | Site 2, bush 2, Budapest, Hungary |                             |
| A19-c                  | <i>Arthrocladiella mougeotii</i> | <i>Lycium halimifolium</i> | 11 Oct. 2007  | Site 2, bush 2, Budapest, Hungary |                             |
| A20-a                  | <i>Arthrocladiella mougeotii</i> | <i>Lycium halimifolium</i> | 11 Oct. 2007  | Site 2, bush 2, Budapest, Hungary | HM124904 (Kiss et al. 2011) |
| A20-b                  | <i>Arthrocladiella mougeotii</i> | <i>Lycium halimifolium</i> | 11 Oct. 2007  | Site 2, bush 2, Budapest, Hungary | HM124905 (Kiss et al. 2011) |
| A20-c                  | <i>Arthrocladiella mougeotii</i> | <i>Lycium halimifolium</i> | 11 Oct. 2007  | Site 2, bush 2, Budapest, Hungary |                             |
| A26                    | <i>Arthrocladiella mougeotii</i> | <i>Lycium halimifolium</i> | 23 Sept. 2007 | Site 4, bush 2, Budapest, Hungary | HM124907 (Kiss et al. 2011) |
| A27-a                  | <i>Arthrocladiella mougeotii</i> | <i>Lycium halimifolium</i> | 23 Sept. 2007 | Site 4, bush 2, Budapest, Hungary | HM124908 (Kiss et al. 2011) |
| A27-b                  | <i>Arthrocladiella mougeotii</i> | <i>Lycium halimifolium</i> | 23 Sept. 2007 | Site 4, bush 2, Budapest, Hungary |                             |

|       |                                  |                           |               |                                   |                             |
|-------|----------------------------------|---------------------------|---------------|-----------------------------------|-----------------------------|
| A33-c | <i>Arthrocladiella mougeotii</i> | <i>Lycium halimfolium</i> | 23 Sept. 2007 | Site 4, bush 3, Budapest, Hungary |                             |
| A33-e | <i>Arthrocladiella mougeotii</i> | <i>Lycium halimfolium</i> | 23 Sept. 2007 | Site 4, bush 3, Budapest, Hungary | HM124913 (Kiss et al. 2011) |
| A34-d | <i>Arthrocladiella mougeotii</i> | <i>Lycium halimfolium</i> | 23 Sept. 2007 | Site 4, bush 3, Budapest, Hungary |                             |
| A36-a | <i>Arthrocladiella mougeotii</i> | <i>Lycium halimfolium</i> | 4 Oct. 2007   | Site 5, bush 1, Budapest, Hungary |                             |
| A37-b | <i>Arthrocladiella mougeotii</i> | <i>Lycium halimfolium</i> | 4 Oct. 2007   | Site 5, bush 1, Budapest, Hungary |                             |
| A38-a | <i>Arthrocladiella mougeotii</i> | <i>Lycium halimfolium</i> | 4 Oct. 2007   | Site 5, bush 1, Budapest, Hungary | HM124915 (Kiss et al. 2011) |
| A38-b | <i>Arthrocladiella mougeotii</i> | <i>Lycium halimfolium</i> | 4 Oct. 2007   | Site 5, bush 1, Budapest, Hungary |                             |
| A38-c | <i>Arthrocladiella mougeotii</i> | <i>Lycium halimfolium</i> | 4 Oct. 2007   | Site 5, bush 1, Budapest, Hungary |                             |
| A39-a | <i>Arthrocladiella mougeotii</i> | <i>Lycium halimfolium</i> | 4 Oct. 2007   | Site 5, bush 2, Budapest, Hungary | HM124916 (Kiss et al. 2011) |
| A39-b | <i>Arthrocladiella mougeotii</i> | <i>Lycium halimfolium</i> | 4 Oct. 2007   | Site 5, bush 2, Budapest, Hungary |                             |
| A39-c | <i>Arthrocladiella mougeotii</i> | <i>Lycium halimfolium</i> | 4 Oct. 2007   | Site 5, bush 2, Budapest, Hungary |                             |
| A41-b | <i>Arthrocladiella mougeotii</i> | <i>Lycium halimfolium</i> | 4 Oct. 2007   | Site 5, bush 2, Budapest, Hungary |                             |
| A41-c | <i>Arthrocladiella mougeotii</i> | <i>Lycium halimfolium</i> | 4 Oct. 2007   | Site 5, bush 2, Budapest, Hungary | HM124918 (Kiss et al. 2011) |
| A45-a | <i>Arthrocladiella mougeotii</i> | <i>Lycium halimfolium</i> | 4 Oct. 2007   | Site 5, bush 3, Budapest, Hungary | HM124920 (Kiss et al. 2011) |
| A45-b | <i>Arthrocladiella mougeotii</i> | <i>Lycium halimfolium</i> | 4 Oct. 2007   | Site 5, bush 3, Budapest, Hungary |                             |
| A46-b | <i>Arthrocladiella mougeotii</i> | <i>Lycium halimfolium</i> | 4 Oct. 2007   | Site 5, bush 3, Budapest, Hungary |                             |
| A47-b | <i>Arthrocladiella mougeotii</i> | <i>Lycium halimfolium</i> | 4 Oct. 2007   | Site 5, bush 3, Budapest, Hungary | HM124921 (Kiss et al. 2011) |
| A49   | <i>Arthrocladiella mougeotii</i> | <i>Lycium halimfolium</i> | 4 Oct. 2007   | Site 6, bush 1, Budapest, Hungary |                             |
| A51   | <i>Arthrocladiella mougeotii</i> | <i>Lycium halimfolium</i> | 4 Oct. 2007   | Site 6, bush 1, Budapest, Hungary |                             |
| A52-b | <i>Arthrocladiella mougeotii</i> | <i>Lycium halimfolium</i> | 4 Oct. 2007   | Site 6, bush 1, Budapest, Hungary |                             |
| A53-a | <i>Arthrocladiella mougeotii</i> | <i>Lycium halimfolium</i> | 5 Oct. 2007   | Site 6, bush 2, Budapest, Hungary |                             |
| A53-b | <i>Arthrocladiella mougeotii</i> | <i>Lycium halimfolium</i> | 5 Oct. 2007   | Site 6, bush 2, Budapest, Hungary |                             |
| A53-c | <i>Arthrocladiella mougeotii</i> | <i>Lycium halimfolium</i> | 5 Oct. 2007   | Site 6, bush 2, Budapest, Hungary |                             |
| A54-a | <i>Arthrocladiella mougeotii</i> | <i>Lycium halimfolium</i> | 5 Oct. 2007   | Site 6, bush 2, Budapest, Hungary |                             |
| A54-b | <i>Arthrocladiella mougeotii</i> | <i>Lycium halimfolium</i> | 5 Oct. 2007   | Site 6, bush 2, Budapest, Hungary |                             |
| A54-c | <i>Arthrocladiella mougeotii</i> | <i>Lycium halimfolium</i> | 5 Oct. 2007   | Site 6, bush 2, Budapest, Hungary |                             |
| A55-a | <i>Arthrocladiella mougeotii</i> | <i>Lycium halimfolium</i> | 5 Oct. 2007   | Site 6, bush 2, Budapest, Hungary |                             |
| A55-b | <i>Arthrocladiella mougeotii</i> | <i>Lycium halimfolium</i> | 5 Oct. 2007   | Site 6, bush 2, Budapest, Hungary |                             |
| A55-c | <i>Arthrocladiella mougeotii</i> | <i>Lycium halimfolium</i> | 5 Oct. 2007   | Site 6, bush 2, Budapest, Hungary |                             |
| A57-a | <i>Arthrocladiella mougeotii</i> | <i>Lycium halimfolium</i> | 30 Oct. 2007  | Site 4, bush 4, Budapest, Hungary |                             |
| A57-b | <i>Arthrocladiella mougeotii</i> | <i>Lycium halimfolium</i> | 30 Oct. 2007  | Site 4, bush 4, Budapest, Hungary |                             |
| A58-b | <i>Arthrocladiella mougeotii</i> | <i>Lycium halimfolium</i> | 30 Oct. 2007  | Site 4, bush 5, Budapest, Hungary |                             |
| A59   | <i>Arthrocladiella mougeotii</i> | <i>Lycium halimfolium</i> | 30 Oct. 2007  | Site 4, bush 5, Budapest, Hungary |                             |
| A60   | <i>Arthrocladiella mougeotii</i> | <i>Lycium halimfolium</i> | 1 Oct. 2007   | Salföld, Hungary                  |                             |
| A61-a | <i>Arthrocladiella mougeotii</i> | <i>Lycium halimfolium</i> | 2 Oct. 2007   | Bush 1, Páty, Hungary             |                             |
| A61-b | <i>Arthrocladiella mougeotii</i> | <i>Lycium halimfolium</i> | 2 Oct. 2007   | Bush 1, Páty, Hungary             | HM124922 (Kiss et al. 2011) |
| A61-c | <i>Arthrocladiella mougeotii</i> | <i>Lycium halimfolium</i> | 2 Oct. 2007   | Bush 1, Páty, Hungary             |                             |
| A62-a | <i>Arthrocladiella mougeotii</i> | <i>Lycium halimfolium</i> | 2 Oct. 2007   | Bush 1, Páty, Hungary             | HM124923 (Kiss et al. 2011) |





|             |                                  |                            |               |                             |                             |
|-------------|----------------------------------|----------------------------|---------------|-----------------------------|-----------------------------|
| A104-c      | <i>Arthrocladiella mougeotii</i> | <i>Lycium halimifolium</i> | 3 Oct. 2007   | Bush 5, Biatorbágy, Hungary |                             |
| A105        | <i>Arthrocladiella mougeotii</i> | <i>Lycium halimifolium</i> | 3 Oct. 2007   | Bush 5, Biatorbágy, Hungary | HM124942 (Kiss et al. 2011) |
| A108-a      | <i>Arthrocladiella mougeotii</i> | <i>Lycium halimifolium</i> | 18 Sept. 2007 | Site 8, Budapest, Hungary   | HM124944 (Kiss et al. 2011) |
| A108-b      | <i>Arthrocladiella mougeotii</i> | <i>Lycium halimifolium</i> | 18 Sept. 2007 | Site 8, Budapest, Hungary   |                             |
| A108-d      | <i>Arthrocladiella mougeotii</i> | <i>Lycium halimifolium</i> | 18 Sept. 2007 | Site 8, Budapest, Hungary   |                             |
| A109-e      | <i>Arthrocladiella mougeotii</i> | <i>Lycium halimifolium</i> | 18 Sept. 2007 | Site 8, Budapest, Hungary   |                             |
| A110-b      | <i>Arthrocladiella mougeotii</i> | <i>Lycium halimifolium</i> | 18 Sept. 2007 | Site 8, Budapest, Hungary   | HM124947 (Kiss et al. 2011) |
| A110-c      | <i>Arthrocladiella mougeotii</i> | <i>Lycium halimifolium</i> | 18 Sept. 2007 | Site 8, Budapest, Hungary   |                             |
| A110-d      | <i>Arthrocladiella mougeotii</i> | <i>Lycium halimifolium</i> | 18 Sept. 2007 | Site 8, Budapest, Hungary   |                             |
| A111-a      | <i>Arthrocladiella mougeotii</i> | <i>Lycium halimifolium</i> | 18 Sept. 2007 | Site 8, Budapest, Hungary   | HM124948 (Kiss et al. 2011) |
| A111-b      | <i>Arthrocladiella mougeotii</i> | <i>Lycium halimifolium</i> | 18 Sept. 2007 | Site 8, Budapest, Hungary   | HM124949 (Kiss et al. 2011) |
| A113-a      | <i>Arthrocladiella mougeotii</i> | <i>Lycium halimifolium</i> | 18 Sept. 2007 | Site 8, Budapest, Hungary   | HM124951 (Kiss et al. 2011) |
| A113-b      | <i>Arthrocladiella mougeotii</i> | <i>Lycium halimifolium</i> | 18 Sept. 2007 | Site 8, Budapest, Hungary   | HM124952 (Kiss et al. 2011) |
| <b>A115</b> | <i>Arthrocladiella mougeotii</i> | <i>Lycium halimifolium</i> | 18 Sept. 2007 | Site 8, Budapest, Hungary   | HM124955 (Kiss et al. 2011) |
| A120        | <i>Arthrocladiella mougeotii</i> | <i>Lycium halimifolium</i> | 2 Oct. 2007   | Bush 1, Páty, Hungary       |                             |

***Ampelomyces strains isolated from apple powdery mildew (Podosphaera leucotricha)***

|                |                                |                        |              |                               |                                    |
|----------------|--------------------------------|------------------------|--------------|-------------------------------|------------------------------------|
| B5             | <i>Podosphaera leucotricha</i> | <i>Malus domestica</i> | May 2000     | Keszű, Hungary                |                                    |
| B6             | <i>Podosphaera leucotricha</i> | <i>Malus domestica</i> | April 2001   | Budapest, Hungary             |                                    |
| B15            | <i>Podosphaera leucotricha</i> | <i>Malus domestica</i> | April 2001   | Keszű, Hungary                |                                    |
| B26            | <i>Podosphaera leucotricha</i> | <i>Malus domestica</i> | May 2002     | Dresden, Germany              |                                    |
| B33 (MYA-3395) | <i>Podosphaera leucotricha</i> | <i>Malus domestica</i> | May 2002     | Ahrensburg, Germany           | AY663817 (Szentiványi et al. 2005) |
| B34 (MYA-3396) | <i>Podosphaera leucotricha</i> | <i>Malus domestica</i> | May 2002     | Cambridge, UK                 | AY663818 (Szentiványi et al. 2005) |
| B37            | <i>Podosphaera leucotricha</i> | <i>Malus domestica</i> | May 2002     | Canterbury, UK                |                                    |
| B38            | <i>Podosphaera leucotricha</i> | <i>Malus domestica</i> | May 2002     | Canterbury, UK                |                                    |
| B41            | <i>Podosphaera leucotricha</i> | <i>Malus domestica</i> | May 2002     | Canterbury, UK                |                                    |
| B42            | <i>Podosphaera leucotricha</i> | <i>Malus domestica</i> | May 2002     | East Malling, UK              |                                    |
| B46            | <i>Podosphaera leucotricha</i> | <i>Malus domestica</i> | May 2002     | East Malling, UK              |                                    |
| B58            | <i>Podosphaera leucotricha</i> | <i>Malus robusta</i>   | 9 April 2008 | Tree 1, Orsay, France         |                                    |
| B59            | <i>Podosphaera leucotricha</i> | <i>Malus robusta</i>   | 9 April 2008 | Tree 1, Orsay, France         |                                    |
| B60            | <i>Podosphaera leucotricha</i> | <i>Malus robusta</i>   | 9 April 2008 | Tree 1, Orsay, France         |                                    |
| B61            | <i>Podosphaera leucotricha</i> | <i>Malus robusta</i>   | 9 April 2008 | Tree 2, Orsay, France         | HM124960 (Kiss et al. 2011)        |
| B62            | <i>Podosphaera leucotricha</i> | <i>Malus robusta</i>   | 9 April 2008 | Tree 3, Orsay, France         |                                    |
| B63            | <i>Podosphaera leucotricha</i> | <i>Malus robusta</i>   | 9 April 2008 | Tree 3, Orsay, France         |                                    |
| B64            | <i>Podosphaera leucotricha</i> | <i>Malus robusta</i>   | 9 April 2008 | Tree 3, Orsay, France         |                                    |
| B65            | <i>Podosphaera leucotricha</i> | <i>Malus robusta</i>   | 9 April 2008 | Tree 3, Orsay, France         |                                    |
| B66            | <i>Podosphaera leucotricha</i> | <i>Malus domestica</i> | 3 May 2008   | Site 1, Tree 1, Cambridge, UK |                                    |
| B67            | <i>Podosphaera leucotricha</i> | <i>Malus domestica</i> | 3 May 2008   | Site 1, Tree 1, Cambridge, UK |                                    |

|      |                                |                          |             |                               |                             |
|------|--------------------------------|--------------------------|-------------|-------------------------------|-----------------------------|
| B68  | <i>Podosphaera leucotricha</i> | <i>Malus domestica</i>   | 3 May 2008  | Site 1, Tree 1, Cambridge, UK |                             |
| B69  | <i>Podosphaera leucotricha</i> | <i>Malus domestica</i>   | 3 May 2008  | Site 1, Tree 1, Cambridge, UK |                             |
| B70  | <i>Podosphaera leucotricha</i> | <i>Malus domestica</i>   | 3 May 2008  | Site 1, Tree 1, Cambridge, UK |                             |
| B71  | <i>Podosphaera leucotricha</i> | <i>Malus domestica</i>   | 3 May 2008  | Site 1, Tree 1, Cambridge, UK |                             |
| B72  | <i>Podosphaera leucotricha</i> | <i>Malus domestica</i>   | 3 May 2008  | Site 1, Tree 1, Cambridge, UK |                             |
| B74  | <i>Podosphaera leucotricha</i> | <i>Malus domestica</i>   | 3 May 2008  | Site 1, Tree 1, Cambridge, UK |                             |
| B75  | <i>Podosphaera leucotricha</i> | <i>Malus domestica</i>   | 3 May 2008  | Site 1, Tree 1, Cambridge, UK |                             |
| B76  | <i>Podosphaera leucotricha</i> | <i>Malus domestica</i>   | 4 May 2008  | Site 1, Tree 2, Cambridge, UK |                             |
| B77  | <i>Podosphaera leucotricha</i> | <i>Malus domestica</i>   | 4 May 2008  | Site 1, Tree 2, Cambridge, UK |                             |
| B79  | <i>Podosphaera leucotricha</i> | <i>Malus domestica</i>   | 5 May 2008  | Stansted, UK                  |                             |
| B80  | <i>Podosphaera leucotricha</i> | <i>Malus domestica</i>   | 5 May 2008  | Stansted, UK                  |                             |
| B82  | <i>Podosphaera leucotricha</i> | <i>Malus domestica</i>   | 5 May 2008  | Stansted, UK                  | HM124961 (Kiss et al. 2011) |
| B83  | <i>Podosphaera leucotricha</i> | <i>Malus domestica</i>   | 5 May 2008  | Stansted, UK                  |                             |
| B84  | <i>Podosphaera leucotricha</i> | <i>Malus domestica</i>   | 5 May 2008  | Stansted, UK                  |                             |
| B85  | <i>Podosphaera leucotricha</i> | <i>Malus domestica</i>   | 5 May 2008  | Stansted, UK                  |                             |
| B86  | <i>Podosphaera leucotricha</i> | <i>Malus domestica</i>   | 5 May 2008  | Stansted, UK                  |                             |
| B87  | <i>Podosphaera leucotricha</i> | <i>Malus domestica</i>   | 7 May 2008  | Site 2, Cambridge, UK         |                             |
| B89  | <i>Podosphaera leucotricha</i> | <i>Malus domestica</i>   | 7 May 2008  | Site 2, Cambridge, UK         |                             |
| B90  | <i>Podosphaera leucotricha</i> | <i>Malus domestica</i>   | 7 May 2008  | Site 2, Cambridge, UK         |                             |
| B91  | <i>Podosphaera leucotricha</i> | <i>Malus domestica</i>   | 8 May 2008  | Tree 1, Canterbury, UK        |                             |
| B92  | <i>Podosphaera leucotricha</i> | <i>Malus domestica</i>   | 8 May 2008  | Tree 1, Canterbury, UK        |                             |
| B94  | <i>Podosphaera leucotricha</i> | <i>Malus domestica</i>   | 8 May 2008  | Tree 1, Canterbury, UK        | HM124962 (Kiss et al. 2011) |
| B95  | <i>Podosphaera leucotricha</i> | <i>Malus domestica</i>   | 8 May 2008  | Tree 1, Canterbury, UK        |                             |
| B97  | <i>Podosphaera leucotricha</i> | <i>Malus domestica</i>   | 8 May 2008  | Tree 2, Canterbury, UK        |                             |
| B99  | <i>Podosphaera leucotricha</i> | <i>Malus domestica</i>   | 8 May 2008  | Tree 2, Canterbury, UK        |                             |
| B100 | <i>Podosphaera leucotricha</i> | <i>Malus domestica</i>   | 8 May 2008  | Tree 2, Canterbury, UK        |                             |
| B101 | <i>Podosphaera leucotricha</i> | <i>Malus mandshurica</i> | 9 May 2008  | Site 1, East Malling, UK      |                             |
| B103 | <i>Podosphaera leucotricha</i> | <i>Malus brevipes</i>    | 9 May 2008  | Site 1, East Malling, UK      |                             |
| B105 | <i>Podosphaera leucotricha</i> | <i>Malus domestica</i>   | 9 May 2008  | Site 2, East Malling, UK      |                             |
| B106 | <i>Podosphaera leucotricha</i> | <i>Malus domestica</i>   | 9 May 2008  | Site 2, East Malling, UK      |                             |
| B107 | <i>Podosphaera leucotricha</i> | <i>Malus domestica</i>   | 9 May 2008  | Site 2, East Malling, UK      |                             |
| B108 | <i>Podosphaera leucotricha</i> | <i>Malus domestica</i>   | 9 May 2008  | Site 2, East Malling, UK      |                             |
| B109 | <i>Podosphaera leucotricha</i> | <i>Malus domestica</i>   | 8 May 2008  | Whittlesford, UK              |                             |
| B110 | <i>Podosphaera leucotricha</i> | <i>Malus domestica</i>   | 8 May 2008  | Whittlesford, UK              |                             |
| B111 | <i>Podosphaera leucotricha</i> | <i>Malus domestica</i>   | 8 May 2008  | Whittlesford, UK              |                             |
| B114 | <i>Podosphaera leucotricha</i> | <i>Malus domestica</i>   | 26 May 2008 | Biatorbágy, Hungary           |                             |
| B115 | <i>Podosphaera leucotricha</i> | <i>Malus domestica</i>   | 26 May 2008 | Biatorbágy, Hungary           |                             |
| B116 | <i>Podosphaera leucotricha</i> | <i>Malus domestica</i>   | 1 June 2008 | Velem, Hungary                |                             |







|        |                                |                        |               |                            |                             |
|--------|--------------------------------|------------------------|---------------|----------------------------|-----------------------------|
| B167-a | <i>Podosphaera leucotricha</i> | <i>Malus domestica</i> | 15 May 2008   | Site 10, Budapest, Hungary |                             |
| B167-b | <i>Podosphaera leucotricha</i> | <i>Malus domestica</i> | 15 May 2008   | Site 10, Budapest, Hungary |                             |
| B168   | <i>Podosphaera leucotricha</i> | <i>Malus domestica</i> | 15 May 2008   | Site 10, Budapest, Hungary |                             |
| B169-b | <i>Podosphaera leucotricha</i> | <i>Malus domestica</i> | 15 May 2008   | Site 10, Budapest, Hungary |                             |
| B170-a | <i>Podosphaera leucotricha</i> | <i>Malus domestica</i> | 15 May 2008   | Site 10, Budapest, Hungary |                             |
| B171-b | <i>Podosphaera leucotricha</i> | <i>Malus domestica</i> | 15 May 2008   | Site 10, Budapest, Hungary |                             |
| B172-a | <i>Podosphaera leucotricha</i> | <i>Malus domestica</i> | 15 May 2008   | Site 10, Budapest, Hungary |                             |
| B175   | <i>Podosphaera leucotricha</i> | <i>Malus domestica</i> | 15 May 2008   | Site 10, Budapest, Hungary |                             |
| B176   | <i>Podosphaera leucotricha</i> | <i>Malus domestica</i> | 15 May 2008   | Site 10, Budapest, Hungary | HM124966 (Kiss et al. 2011) |
| B177-b | <i>Podosphaera leucotricha</i> | <i>Malus domestica</i> | 15 May 2008   | Site 10, Budapest, Hungary |                             |
| B179-a | <i>Podosphaera leucotricha</i> | <i>Malus domestica</i> | 15 May 2008   | Site 10, Budapest, Hungary |                             |
| B179-b | <i>Podosphaera leucotricha</i> | <i>Malus domestica</i> | 15 May 2008   | Site 10, Budapest, Hungary |                             |
| B180-b | <i>Podosphaera leucotricha</i> | <i>Malus domestica</i> | 15 May 2008   | Site 10, Budapest, Hungary |                             |
| B181-b | <i>Podosphaera leucotricha</i> | <i>Malus domestica</i> | 15 May 2008   | Site 10, Budapest, Hungary |                             |
| B182   | <i>Podosphaera leucotricha</i> | <i>Malus domestica</i> | 30 April 2008 | Gödöllő, Hungary           |                             |
| B183   | <i>Podosphaera leucotricha</i> | <i>Malus domestica</i> | 30 April 2008 | Gödöllő, Hungary           |                             |
| B184-b | <i>Podosphaera leucotricha</i> | <i>Malus domestica</i> | 30 April 2008 | Gödöllő, Hungary           |                             |
| B185   | <i>Podosphaera leucotricha</i> | <i>Malus domestica</i> | 1 June 2008   | Keszű, Hungary             |                             |
| B186-a | <i>Podosphaera leucotricha</i> | <i>Malus domestica</i> | 1 June 2008   | Keszű, Hungary             |                             |
| B186-b | <i>Podosphaera leucotricha</i> | <i>Malus domestica</i> | 1 June 2008   | Keszű, Hungary             |                             |
| B187-a | <i>Podosphaera leucotricha</i> | <i>Malus domestica</i> | 1 June 2008   | Keszű, Hungary             |                             |
| B187-b | <i>Podosphaera leucotricha</i> | <i>Malus domestica</i> | 1 June 2008   | Keszű, Hungary             |                             |
| B188   | <i>Podosphaera leucotricha</i> | <i>Malus domestica</i> | 1 June 2008   | Keszű, Hungary             |                             |
| B189   | <i>Podosphaera leucotricha</i> | <i>Malus domestica</i> | 1 June 2008   | Keszű, Hungary             |                             |
| B190   | <i>Podosphaera leucotricha</i> | <i>Malus domestica</i> | 1 June 2008   | Keszű, Hungary             | HM124967 (Kiss et al. 2011) |
| B191-a | <i>Podosphaera leucotricha</i> | <i>Malus domestica</i> | 1 June 2008   | Keszű, Hungary             |                             |
| B191-b | <i>Podosphaera leucotricha</i> | <i>Malus domestica</i> | 1 June 2008   | Keszű, Hungary             |                             |
| B192   | <i>Podosphaera leucotricha</i> | <i>Malus domestica</i> | 2 May 2008    | Tree 1, Orsay, France      |                             |
| B193   | <i>Podosphaera leucotricha</i> | <i>Malus domestica</i> | 2 May 2008    | Tree 9, Orsay, France      |                             |
| B194   | <i>Podosphaera leucotricha</i> | <i>Malus domestica</i> | 2 May 2008    | Tree 11, Orsay, France     |                             |
| B195   | <i>Podosphaera leucotricha</i> | <i>Malus domestica</i> | 2 May 2008    | Tree 12, Orsay, France     |                             |
| B196   | <i>Podosphaera leucotricha</i> | <i>Malus domestica</i> | 2 May 2008    | Tree 14, Orsay, France     |                             |
| B197   | <i>Podosphaera leucotricha</i> | <i>Malus domestica</i> | 2 May 2008    | Tree 14, Orsay, France     |                             |
| B198   | <i>Podosphaera leucotricha</i> | <i>Malus domestica</i> | 2 May 2008    | Tree 14, Orsay, France     |                             |
| B199   | <i>Podosphaera leucotricha</i> | <i>Malus domestica</i> | 2 May 2008    | Tree 15, Orsay, France     |                             |
| B200   | <i>Podosphaera leucotricha</i> | <i>Malus domestica</i> | 2 May 2008    | Tree 15, Orsay, France     | HM124968 (Kiss et al. 2011) |
| B201   | <i>Podosphaera leucotricha</i> | <i>Malus domestica</i> | 2 May 2008    | Tree 16, Orsay, France     |                             |
| B202   | <i>Podosphaera leucotricha</i> | <i>Malus domestica</i> | 2 May 2008    | Tree 18, Orsay, France     |                             |



|        |                                |                        |               |                                   |
|--------|--------------------------------|------------------------|---------------|-----------------------------------|
| B228   | <i>Podosphaera leucotricha</i> | <i>Malus domestica</i> | 5 May 2008    | Site 1, tree 9, Gotheron, France  |
| B229-a | <i>Podosphaera leucotricha</i> | <i>Malus domestica</i> | 5 May 2008    | Site 1, tree 10, Gotheron, France |
| B229-b | <i>Podosphaera leucotricha</i> | <i>Malus domestica</i> | 5 May 2008    | Site 1, tree 10, Gotheron, France |
| B230-a | <i>Podosphaera leucotricha</i> | <i>Malus domestica</i> | 5 May 2008    | Site 1, tree 11, Gotheron, France |
| B230-b | <i>Podosphaera leucotricha</i> | <i>Malus domestica</i> | 5 May 2008    | Site 1, tree 11, Gotheron, France |
| B231   | <i>Podosphaera leucotricha</i> | <i>Malus domestica</i> | 5 May 2008    | Site 1, tree 11, Gotheron, France |
| B234   | <i>Podosphaera leucotricha</i> | <i>Malus domestica</i> | 5 May 2008    | Site 1, tree 13, Gotheron, France |
| B235   | <i>Podosphaera leucotricha</i> | <i>Malus domestica</i> | 5 May 2008    | Site 1, tree 13, Gotheron, France |
| B236-a | <i>Podosphaera leucotricha</i> | <i>Malus domestica</i> | 5 May 2008    | Site 1, tree 14, Gotheron, France |
| B236-b | <i>Podosphaera leucotricha</i> | <i>Malus domestica</i> | 5 May 2008    | Site 1, tree 14, Gotheron, France |
| B237-a | <i>Podosphaera leucotricha</i> | <i>Malus domestica</i> | 5 May 2008    | Site 1, tree 14, Gotheron, France |
| B237-b | <i>Podosphaera leucotricha</i> | <i>Malus domestica</i> | 5 May 2008    | Site 1, tree 14, Gotheron, France |
| B239-a | <i>Podosphaera leucotricha</i> | <i>Malus domestica</i> | 5 May 2008    | Site 1, tree 15, Gotheron, France |
| B239-b | <i>Podosphaera leucotricha</i> | <i>Malus domestica</i> | 5 May 2008    | Site 1, tree 15, Gotheron, France |
| B240-a | <i>Podosphaera leucotricha</i> | <i>Malus domestica</i> | 6 May 2008    | Site 2, tree 1, Gotheron, France  |
| B240-b | <i>Podosphaera leucotricha</i> | <i>Malus domestica</i> | 6 May 2008    | Site 2, tree 1, Gotheron, France  |
| B242   | <i>Podosphaera leucotricha</i> | <i>Malus domestica</i> | 6 May 2008    | Site 2, tree 5, Gotheron, France  |
| B244-a | <i>Podosphaera leucotricha</i> | <i>Malus domestica</i> | 6 May 2008    | Site 2, tree 7, Gotheron, France  |
| B244-b | <i>Podosphaera leucotricha</i> | <i>Malus domestica</i> | 6 May 2008    | Site 2, tree 7, Gotheron, France  |
| B245   | <i>Podosphaera leucotricha</i> | <i>Malus domestica</i> | 17 Sept. 2007 | Eperjeske, Hungary                |
| B246   | <i>Podosphaera leucotricha</i> | <i>Malus domestica</i> | 28 April 2008 | Tree 2, Eperjeske, Hungary        |

**Powdery mildew-infected apple leaf samples with *Ampelomyces***

|     |                                |                        |              |                       |
|-----|--------------------------------|------------------------|--------------|-----------------------|
| b13 | <i>Podosphaera leucotricha</i> | <i>Malus robusta</i>   | 9 April 2008 | Tree 1, Orsay, France |
| b20 | <i>Podosphaera leucotricha</i> | <i>Malus robusta</i>   | 9 April 2008 | Tree 2, Orsay, France |
| b25 | <i>Podosphaera leucotricha</i> | <i>Malus domestica</i> | 2 May 2008   | Tree 2, Orsay, France |
| b26 | <i>Podosphaera leucotricha</i> | <i>Malus domestica</i> | 2 May 2008   | Tree 2, Orsay, France |
| b27 | <i>Podosphaera leucotricha</i> | <i>Malus domestica</i> | 2 May 2008   | Tree 3, Orsay, France |
| b30 | <i>Podosphaera leucotricha</i> | <i>Malus domestica</i> | 2 May 2008   | Tree 3, Orsay, France |
| b31 | <i>Podosphaera leucotricha</i> | <i>Malus domestica</i> | 2 May 2008   | Tree 3, Orsay, France |
| b33 | <i>Podosphaera leucotricha</i> | <i>Malus domestica</i> | 2 May 2008   | Tree 3, Orsay, France |
| b34 | <i>Podosphaera leucotricha</i> | <i>Malus domestica</i> | 2 May 2008   | Tree 3, Orsay, France |
| b35 | <i>Podosphaera leucotricha</i> | <i>Malus domestica</i> | 2 May 2008   | Tree 3, Orsay, France |
| b36 | <i>Podosphaera leucotricha</i> | <i>Malus domestica</i> | 2 May 2008   | Tree 3, Orsay, France |
| b41 | <i>Podosphaera leucotricha</i> | <i>Malus domestica</i> | 2 May 2008   | Tree 4, Orsay, France |
| b44 | <i>Podosphaera leucotricha</i> | <i>Malus domestica</i> | 2 May 2008   | Tree 4, Orsay, France |
| b46 | <i>Podosphaera leucotricha</i> | <i>Malus domestica</i> | 2 May 2008   | Tree 4, Orsay, France |
| b49 | <i>Podosphaera leucotricha</i> | <i>Malus domestica</i> | 2 May 2008   | Tree 4, Orsay, France |







|        |                                |                        |               |                                   |
|--------|--------------------------------|------------------------|---------------|-----------------------------------|
| b256   | <i>Podosphaera leucotricha</i> | <i>Malus domestica</i> | 6 May 2008    | Site 2, tree 5, Gotheron, France  |
| b257   | <i>Podosphaera leucotricha</i> | <i>Malus domestica</i> | 6 May 2008    | Site 2, tree 5, Gotheron, France  |
| b258   | <i>Podosphaera leucotricha</i> | <i>Malus domestica</i> | 6 May 2008    | Site 2, tree 5, Gotheron, France  |
| b261   | <i>Podosphaera leucotricha</i> | <i>Malus domestica</i> | 6 May 2008    | Site 2, tree 5, Gotheron, France  |
| b263   | <i>Podosphaera leucotricha</i> | <i>Malus domestica</i> | 6 May 2008    | Site 2, tree 6, Gotheron, France  |
| b266   | <i>Podosphaera leucotricha</i> | <i>Malus domestica</i> | 6 May 2008    | Site 2, tree 7, Gotheron, France  |
| b267   | <i>Podosphaera leucotricha</i> | <i>Malus domestica</i> | 6 May 2008    | Site 2, tree 7, Gotheron, France  |
| b268   | <i>Podosphaera leucotricha</i> | <i>Malus domestica</i> | 6 May 2008    | Site 2, tree 7, Gotheron, France  |
| b269   | <i>Podosphaera leucotricha</i> | <i>Malus domestica</i> | 6 May 2008    | Site 2, tree 7, Gotheron, France  |
| b271   | <i>Podosphaera leucotricha</i> | <i>Malus domestica</i> | 6 May 2008    | Site 2, tree 7, Gotheron, France  |
| b273   | <i>Podosphaera leucotricha</i> | <i>Malus domestica</i> | 6 May 2008    | Site 2, tree 8, Gotheron, France  |
| b275   | <i>Podosphaera leucotricha</i> | <i>Malus domestica</i> | 6 May 2008    | Site 2, tree 8, Gotheron, France  |
| b282-a | <i>Podosphaera leucotricha</i> | <i>Malus domestica</i> | 28 April 2008 | Tree 6, Eperjeske, Hungary        |
| b285-a | <i>Podosphaera leucotricha</i> | <i>Malus domestica</i> | 28 April 2008 | Tree 6, Eperjeske, Hungary        |
| b287-a | <i>Podosphaera leucotricha</i> | <i>Malus domestica</i> | 28 April 2008 | Tree 6, Eperjeske, Hungary        |
| b288-c | <i>Podosphaera leucotricha</i> | <i>Malus domestica</i> | 28 April 2008 | Tree 6, Eperjeske, Hungary        |
| b291   | <i>Podosphaera leucotricha</i> | <i>Malus domestica</i> | 22 April 2008 | Site 9, Tree 1, Budapest, Hungary |
| b297   | <i>Podosphaera leucotricha</i> | <i>Malus domestica</i> | 30 April 2008 | Gödöllő, Hungary                  |
| b299   | <i>Podosphaera leucotricha</i> | <i>Malus domestica</i> | 30 April 2008 | Gödöllő, Hungary                  |
| b301   | <i>Podosphaera leucotricha</i> | <i>Malus domestica</i> | 30 April 2008 | Gödöllő, Hungary                  |
| b304   | <i>Podosphaera leucotricha</i> | <i>Malus domestica</i> | 30 April 2008 | Gödöllő, Hungary                  |
| b307   | <i>Podosphaera leucotricha</i> | <i>Malus domestica</i> | 30 April 2008 | Gödöllő, Hungary                  |
| b310   | <i>Podosphaera leucotricha</i> | <i>Malus domestica</i> | 30 April 2008 | Gödöllő, Hungary                  |
| b315   | <i>Podosphaera leucotricha</i> | <i>Malus domestica</i> | June 2008     | Keszű, Hungary                    |
| b318   | <i>Podosphaera leucotricha</i> | <i>Malus domestica</i> | June 2008     | Keszű, Hungary                    |
| b324   | <i>Podosphaera leucotricha</i> | <i>Malus domestica</i> | June 2008     | Keszű, Hungary                    |
| b326   | <i>Podosphaera leucotricha</i> | <i>Malus domestica</i> | June 2008     | Keszű, Hungary                    |
| b331   | <i>Podosphaera leucotricha</i> | <i>Malus domestica</i> | June 2008     | Keszű, Hungary                    |
| b333   | <i>Podosphaera leucotricha</i> | <i>Malus domestica</i> | June 2008     | Keszű, Hungary                    |
| b339   | <i>Podosphaera leucotricha</i> | <i>Malus domestica</i> | June 2008     | Keszű, Hungary                    |
| b342   | <i>Podosphaera leucotricha</i> | <i>Malus domestica</i> | June 2008     | Velem, Hungary                    |
| b344   | <i>Podosphaera leucotricha</i> | <i>Malus domestica</i> | June 2008     | Velem, Hungary                    |
| b346   | <i>Podosphaera leucotricha</i> | <i>Malus domestica</i> | June 2008     | Velem, Hungary                    |

**Ampelomyces strains isolated from other powdery mildew species**

|       |                            |                          |               |                            |                             |
|-------|----------------------------|--------------------------|---------------|----------------------------|-----------------------------|
| BV2   | <i>Erysiphe berberidis</i> | <i>Berberis vulgaris</i> | 20 Sept. 2007 | Site 11, Budapest, Hungary | HM124958 (Kiss et al. 2011) |
| BV4-b | <i>Erysiphe berberidis</i> | <i>Berberis vulgaris</i> | 20 Sept. 2007 | Site 11, Budapest, Hungary |                             |



|              |                                    |                           |               |                                |                             |
|--------------|------------------------------------|---------------------------|---------------|--------------------------------|-----------------------------|
| BV4-c        | <i>Erysiphe berberidis</i>         | <i>Berberis vulgaris</i>  | 20 Sept. 2007 | Site 11, Budapest, Hungary     |                             |
| RA1-b        | <i>Erysiphe polygoni</i>           | <i>Rumex acetosa</i>      | 10 Oct. 2007  | Site 1, Budapest, Hungary      |                             |
| RA2-a        | <i>Erysiphe polygoni</i>           | <i>Rumex acetosa</i>      | 10 Oct. 2007  | Site 1, Budapest, Hungary      | HM125004 (Kiss et al. 2011) |
| RA2-d        | <i>Erysiphe polygoni</i>           | <i>Rumex acetosa</i>      | 10 Oct. 2007  | Site 1, Budapest, Hungary      | HM125005 (Kiss et al. 2011) |
| <b>MA1-c</b> | <i>Erysiphe berberidis</i>         | <i>Mahonia aquifolium</i> | 25 Sept. 2007 | Site 12, Budapest, Hungary     | HM124992 (Kiss et al. 2011) |
| MA5          | <i>Erysiphe berberidis</i>         | <i>Mahonia aquifolium</i> | 11 Oct. 2007  | Site 2, Budapest, Hungary      |                             |
| MA6-b        | <i>Erysiphe berberidis</i>         | <i>Mahonia aquifolium</i> | 11 Oct. 2007  | Site 2, Budapest, Hungary      | HM124996 (Kiss et al. 2011) |
| MA7-a        | <i>Erysiphe berberidis</i>         | <i>Mahonia aquifolium</i> | 11 Oct. 2007  | Site 2, Budapest, Hungary      |                             |
| MA7-b        | <i>Erysiphe berberidis</i>         | <i>Mahonia aquifolium</i> | 11 Oct. 2007  | Site 2, Budapest, Hungary      |                             |
| MA8          | <i>Erysiphe berberidis</i>         | <i>Mahonia aquifolium</i> | 25 Sept. 2007 | Site 12, Budapest, Hungary     | HM124997 (Kiss et al. 2011) |
| MA-H         | <i>Erysiphe berberidis</i>         | <i>Mahonia aquifolium</i> | 11 Oct. 2007  | Site 2, Budapest, Hungary      |                             |
| <b>RS1-a</b> | <i>Podospaera pannosa</i>          | <i>Rosa</i> sp.           | 5 Oct. 2007   | Site 13, Budapest, Hungary     | HM125010 (Kiss et al. 2011) |
| RS2-a        | <i>Podospaera pannosa</i>          | <i>Rosa</i> sp.           | 5 Oct. 2007   | Site 13, Budapest, Hungary     |                             |
| RS2-b        | <i>Podospaera pannosa</i>          | <i>Rosa</i> sp.           | 5 Oct. 2007   | Site 13, Budapest, Hungary     |                             |
| RS3-a        | <i>Podospaera pannosa</i>          | <i>Rosa</i> sp.           | 5 Oct. 2007   | Site 13, Budapest, Hungary     | HM125011 (Kiss et al. 2011) |
| RS3-b        | <i>Podospaera pannosa</i>          | <i>Rosa</i> sp.           | 5 Oct. 2007   | Site 13, Budapest, Hungary     |                             |
| PN1-a        | <i>Erysiphe sordida</i>            | <i>Plantago major</i>     | 9 Oct. 2007   | Site 10, Budapest, Hungary     | HM125000 (Kiss et al. 2011) |
| PN2          | <i>Erysiphe sordida</i>            | <i>Plantago major</i>     | 9 Oct. 2007   | Site 10, Budapest, Hungary     |                             |
| PN3          | <i>Erysiphe sordida</i>            | <i>Plantago major</i>     | 9 Oct. 2007   | Site 10, Budapest, Hungary     |                             |
| PN4-a        | <i>Erysiphe sordida</i>            | <i>Plantago major</i>     | 9 Oct. 2007   | Site 10, Budapest, Hungary     |                             |
| PN4-b        | <i>Erysiphe sordida</i>            | <i>Plantago major</i>     | 9 Oct. 2007   | Site 10, Budapest, Hungary     | HM125001 (Kiss et al. 2011) |
| XL1-a        | <i>Erysiphe depressa</i>           | <i>Arctium lappa</i>      | 10 Oct. 2007  | Site 1, Budapest, Hungary      | HM125025 (Kiss et al. 2011) |
| XL1-b        | <i>Erysiphe depressa</i>           | <i>Arctium lappa</i>      | 10 Oct. 2007  | Site 1, Budapest, Hungary      |                             |
| XL2-b        | <i>Erysiphe depressa</i>           | <i>Arctium lappa</i>      | 10 Oct. 2007  | Site 1, Budapest, Hungary      | HM125027 (Kiss et al. 2011) |
| XL3-a        | <i>Erysiphe depressa</i>           | <i>Arctium lappa</i>      | 10 Oct. 2007  | Site 1, Budapest, Hungary      | HM125028 (Kiss et al. 2011) |
| XL3-b        | <i>Erysiphe depressa</i>           | <i>Arctium lappa</i>      | 10 Oct. 2007  | Site 1, Budapest, Hungary      | HM125029 (Kiss et al. 2011) |
| XL4-a        | <i>Erysiphe depressa</i>           | <i>Arctium lappa</i>      | 10 Oct. 2007  | Site 1, Budapest, Hungary      |                             |
| XL4-b        | <i>Erysiphe depressa</i>           | <i>Arctium lappa</i>      | 10 Oct. 2007  | Site 1, Budapest, Hungary      | HM125030 (Kiss et al. 2011) |
| XL4-c        | <i>Erysiphe depressa</i>           | <i>Arctium lappa</i>      | 10 Oct. 2007  | Site 1, Budapest, Hungary      |                             |
| <b>LV2-b</b> | <i>Erysiphe</i> sp.                | <i>Ligustrum vulgare</i>  | 17 Oct. 2007  | Budakeszi, Hungary             | HM124990 (Kiss et al. 2011) |
| TP1          | <i>Erysiphe trifolii</i>           | <i>Trifolium pratense</i> | 3 Oct. 2007   | Site 1, tree, Gotheron, France | HM125019 (Kiss et al. 2011) |
| TP3          | <i>Erysiphe trifolii</i>           | <i>Trifolium pratense</i> | 3 Oct. 2007   | Site 1, Gotheron, France       |                             |
| TP4          | <i>Erysiphe trifolii</i>           | <i>Trifolium pratense</i> | 3 Oct. 2007   | Site 1, Gotheron, France       |                             |
| TP5          | <i>Erysiphe trifolii</i>           | <i>Trifolium pratense</i> | 3 Oct. 2007   | Site 1, Gotheron, France       |                             |
| TR1          | <i>Erysiphe trifolii</i>           | <i>Trifolium pratense</i> | 3 Oct. 2007   | Site 1, Gotheron, France       | HM125024 (Kiss et al. 2011) |
| <b>H14</b>   | <i>Erysiphe trifolii</i>           | <i>Trifolium pratense</i> | 3 Oct. 2007   | Site 1, tree, Gotheron, France |                             |
| GS1          | <i>Erysiphe cruciferarum</i>       | <i>Alyssum calycinum</i>  | 5 May 2008    | Site 1, Gotheron, France       | HM124979 (Kiss et al. 2011) |
| GY-a         | <i>Golovinomyces cichoracearum</i> | <i>Lactuca</i> sp.        | 5 May 2008    | Site 1, Gotheron, France       | HM124981 (Kiss et al. 2011) |

|                 |                                    |                            |            |                          |                                 |
|-----------------|------------------------------------|----------------------------|------------|--------------------------|---------------------------------|
| GY-b            | <i>Golovinomyces cichoracearum</i> | <i>Lactuca</i> sp.         | 5 May 2008 | Site 1, Gotheron, France | HM124982 (Kiss et al. 2011)     |
| GY-c            | <i>Golovinomyces cichoracearum</i> | <i>Lactuca</i> sp.         | 5 May 2008 | Site 1, Gotheron, France |                                 |
| GL              | <i>Neoerysiphe galeopsidis</i>     | <i>Lamium</i> sp.          | 5 May 2008 | Site 1, Gotheron, France | HM124978 (Kiss et al. 2011)     |
| ALA1-a          | <i>Golovinomyces cichoracearum</i> | <i>Lactuca</i> sp.         | 9 May 2008 | Avignon, France          | HM124956 (Kiss et al. 2011)     |
| Aq SA           | <i>Podosphaera pannosa</i>         | <i>Rosa</i> sp.            |            | Rep. South Africa        | HM125014 (Kiss et al. 2011)     |
| <b>HMLAC226</b> | <i>Erysiphe polygoni</i>           | <i>Polygonum aviculare</i> | 2003       | Mengyin, Shandong, China | DQ490766 (Liang et al. 2007)    |
| <b>G2</b>       | <i>Erysiphe polygoni</i>           | <i>Rumex patientia</i>     | 2002       | Budapest, Hungary        | DQ490770 (Liang et al. 2007)    |
| <b>DSM 2222</b> | <i>Podosphaera xanthii</i>         | <i>Cucumis</i> sp.         |            | Germany                  | U82450 (Kiss & Nakasone 1998)   |
| <b>AQ10</b>     | <i>Oidium</i> sp.                  | <i>Catha edulis</i>        |            | Israel                   | AF035783 (Kiss & Nakasone 1998) |
| GYER            | <i>Erysiphe arcuata</i>            | <i>Carpinus betulus</i>    | Oct. 2008  | Budapest, Hungary        | HM124983 (Kiss et al 2011)      |
| GW              | <i>Erysiphe cynoglossi</i>         | <i>Echium</i> sp.          | 4 May 2008 | Site 1, Gotheron, France | HM124983 (Kiss et al. 2011)     |

**Powdery mildew-infected leaf samples, other than apple leaves, containing *Ampelomyces pycnidia***

|      |                          |                           |             |                          |
|------|--------------------------|---------------------------|-------------|--------------------------|
| tp2  | <i>Erysiphe trifolii</i> | <i>Trifolium pratense</i> | 3 Oct. 2007 | Site 1, Gotheron, France |
| tp13 | <i>Erysiphe trifolii</i> | <i>Trifolium pratense</i> | 3 Oct. 2007 | Site 1, Gotheron, France |
| tp20 | <i>Erysiphe trifolii</i> | <i>Trifolium pratense</i> | 3 Oct. 2007 | Site 1, Gotheron, France |
| tp21 | <i>Erysiphe trifolii</i> | <i>Trifolium pratense</i> | 3 Oct. 2007 | Site 1, Gotheron, France |
| tp24 | <i>Erysiphe trifolii</i> | <i>Trifolium pratense</i> | 3 Oct. 2007 | Site 1, Gotheron, France |
| tp25 | <i>Erysiphe trifolii</i> | <i>Trifolium pratense</i> | 3 Oct. 2007 | Site 1, Gotheron, France |
