# Supplementary material for: Host Phenology and Geography as Drivers of Differentiation in Generalist Fungal Mycoparasites
Source: PubMed Central journal article supplement (PMC4372539; doi:10.1371/journal.pone.0120703), 2015-03-24
Supplement: pone.0120703.s006.pdf [file pone.0120703.s006.pdf]

Table S2: genotypes of *Ampelomyces* strains isolated from different mycohosts, genotyped with five microsatellite markers

|                                                                                                                       | Lk7c | Lk3a | Lk10c | Lk3b | Lk10d |
|-----------------------------------------------------------------------------------------------------------------------|------|------|-------|------|-------|
| <b><i>Ampelomyces</i> strains isolated from grass powdery mildew (<i>Blumea</i>)</b>                                  |      |      |       |      |       |
| BgrA                                                                                                                  | 194  | 269  | 179   | 132  | 239   |
| BgrB                                                                                                                  | 194  | 269  | 179   | 132  | 239   |
| BgrC                                                                                                                  | 194  | 269  | 179   | 132  | 239   |
| BgrD                                                                                                                  | 194  | 269  | 179   | 132  | 239   |
| BgrE                                                                                                                  | 194  | 269  | 179   | 132  | 239   |
| BgrF                                                                                                                  | 194  | 269  | 179   | 132  | 239   |
| BgrG                                                                                                                  | 194  | 269  | 179   | 132  | 239   |
| BgrH                                                                                                                  | 194  | 269  | 179   | 132  | 239   |
| BgrI                                                                                                                  | 194  | 296  | 149   | 132  | 200   |
| KACC 43563                                                                                                            | 176  | 269  | 179   | 132  | 239   |
| KACC 44850                                                                                                            | 176  | 296  | 182   | 132  | 203   |
| KACC 44851                                                                                                            | 194  | 269  | 179   | 132  | 239   |
| <b><i>Ampelomyces</i> strains isolated from grapevine powdery mildew (<i>Erysiphe necator</i>)</b>                    |      |      |       |      |       |
| Vitis42                                                                                                               | 194  | 242  | 176   | 132  | 239   |
| Vitis55                                                                                                               | 194  | 242  | 179   | 132  | 251   |
| Vitis56                                                                                                               | 194  | 242  | 179   | 132  | 230   |
| Vitis60                                                                                                               | 194  | 254  | 179   | 132  | 239   |
| Vitis70 (CBS 132)                                                                                                     | 179  | 206  | 179   | 126  | 224   |
| Vitis71                                                                                                               | 179  | 206  | 179   | 126  | 224   |
| Vitis72                                                                                                               | 194  | 272  | 173   | 132  | 248   |
| Vitis76                                                                                                               | 194  | 242  | 179   | 132  | 239   |
| Vitis79                                                                                                               | 194  | 242  | 179   | 132  | 239   |
| Vitis81                                                                                                               | 194  | 254  | 179   | 132  | 239   |
| Vitis98                                                                                                               | 212  | 242  | 176   | 132  | 224   |
| Vitis107                                                                                                              | 194  | 254  | 179   | 132  | 236   |
| Vitis113                                                                                                              | 176  | 236  | 176   | 132  | 188   |
| Vitis115                                                                                                              | 176  | 242  | 176   | 138  | 206   |
| Vitis117                                                                                                              | 176  | 242  | 176   | 138  | 209   |
| G273 (ATCC200)                                                                                                        | 176  | 260  | 176   | 132  | 188   |
| SF423 (ATCC20)                                                                                                        | 176  | 236  | 176   | 132  | 188   |
| <b><i>Ampelomyces</i> strains isolated from <i>Arthrocladiella mougeotii</i> infecting <i>Lycium halimifolium</i></b> |      |      |       |      |       |
| A1 (ATCC20105)                                                                                                        | 212  | 242  | 179   | 132  | 212   |
| A8                                                                                                                    | 203  | 263  | 176   | 132  | 221   |
| A10-a                                                                                                                 | 212  | 263  | 179   | 132  | 221   |
| A10-c                                                                                                                 | 212  | 263  | 179   | 132  | 221   |
| A11-a                                                                                                                 | 203  | 263  | 176   | 132  | 221   |
| A11-b                                                                                                                 | 203  | 263  | 176   | 132  | 221   |
| A11-c                                                                                                                 | 203  | 263  | 176   | 132  | 221   |
| A12-a                                                                                                                 | 203  | 263  | 176   | 132  | 221   |
| A12-c                                                                                                                 | 203  | 263  | 176   | 132  | 221   |
| A13-a                                                                                                                 | 203  | 263  | 176   | 132  | 221   |
| A13-b                                                                                                                 | 203  | 263  | 176   | 132  | 221   |
| A13-c                                                                                                                 | 203  | 263  | 176   | 132  | 221   |
| A14-a                                                                                                                 | 203  | 263  | 176   | 132  | 221   |

|       |     |     |     |     |     |
|-------|-----|-----|-----|-----|-----|
| A14-b | 203 | 263 | 176 | 132 | 221 |
| A14-c | 203 | 263 | 176 | 132 | 221 |
| A14-d | 203 | 263 | 176 | 132 | 221 |
| A15-a | 212 | 257 | 179 | 132 | 221 |
| A17   | 212 | 257 | 179 | 132 | 221 |
| A18-a | 203 | 242 | 176 | 132 | 221 |
| A19-a | 212 | 242 | 176 | 132 | 212 |
| A19-b | 212 | 242 | 176 | 132 | 212 |
| A19-c | 212 | 242 | 176 | 132 | 212 |
| A20-a | 212 | 242 | 176 | 132 | 212 |
| A20-b | 212 | 242 | 176 | 132 | 212 |
| A20-c | 212 | 242 | 176 | 132 | 212 |
| A26   | 212 | 263 | 179 | 132 | 212 |
| A27-a | 203 | 242 | 179 | 132 | 224 |
| A27-b | 203 | 242 | 179 | 132 | 224 |
| A33-c | 203 | 263 | 179 | 132 | 239 |
| A33-e | 203 | 263 | 179 | 132 | 239 |
| A34-d | 203 | 263 | 179 | 132 | 239 |
| A36-a | 188 | 209 | 197 | 126 | 221 |
| A37-b | 188 | 209 | 197 | 126 | 221 |
| A38-a | 188 | 209 | 197 | 126 | 221 |
| A38-b | 188 | 209 | 197 | 126 | 221 |
| A38-c | 188 | 209 | 197 | 126 | 221 |
| A39-a | 194 | 257 | 176 | 132 | 212 |
| A39-b | 188 | 209 | 197 | 126 | 215 |
| A39-c | 212 | 263 | 176 | 132 | 233 |
| A41-b | 194 | 257 | 176 | 132 | 212 |
| A41-c | 203 | 257 | 176 | 132 | 212 |
| A45-a | 188 | 209 | 197 | 126 | 221 |
| A45-b | 188 | 209 | 197 | 126 | 221 |
| A46-b | 188 | 209 | 197 | 126 | 221 |
| A47-b | 179 | 209 | 179 | 126 | 221 |
| A49   | 203 | 242 | 179 | 132 | 221 |
| A51   | 203 | 242 | 179 | 132 | 221 |
| A52-b | 194 | 248 | 179 | 132 | 224 |
| A53-a | 194 | 212 | 149 | 132 | 209 |
| A53-b | 194 | 212 | 149 | 132 | 209 |
| A53-c | 194 | 212 | 149 | 132 | 209 |
| A54-a | 194 | 212 | 149 | 132 | 209 |
| A54-b | 194 | 212 | 149 | 132 | 209 |
| A54-c | 194 | 212 | 149 | 132 | 209 |
| A55-a | 194 | 212 | 149 | 132 | 209 |
| A55-b | 194 | 212 | 149 | 132 | 209 |
| A55-c | 194 | 212 | 149 | 132 | 209 |
| A57-a | 194 | 242 | 179 | 132 | 239 |
| A57-b | 194 | 242 | 179 | 132 | 239 |
| A58-b | 194 | 254 | 179 | 132 | 257 |
| A59   | 194 | 239 | 176 | 132 | 236 |
| A60   | 194 | 269 | 179 | 132 | 239 |
| A61-a | 194 | 269 | 179 | 132 | 239 |

|       |     |     |     |     |     |
|-------|-----|-----|-----|-----|-----|
| A61-b | 194 | 269 | 179 | 132 | 239 |
| A61-c | 194 | 269 | 179 | 132 | 239 |
| A62-a | 194 | 269 | 179 | 132 | 239 |
| A62-b | 194 | 269 | 179 | 132 | 239 |
| A62-c | 194 | 269 | 179 | 132 | 239 |
| A63-a | 179 | 209 | 179 | 126 | 221 |
| A64-a | 194 | 269 | 179 | 132 | 239 |
| A64-b | 194 | 269 | 179 | 132 | 239 |
| A64-c | 194 | 269 | 179 | 132 | 239 |
| A69-a | 212 | 263 | 179 | 132 | 212 |
| A69-b | 212 | 263 | 179 | 132 | 212 |
| A70-a | 212 | 263 | 179 | 132 | 212 |
| A70-b | 212 | 263 | 179 | 132 | 212 |
| A71-a | 212 | 263 | 179 | 132 | 212 |
| A71-b | 212 | 263 | 179 | 132 | 212 |
| A72-a | 212 | 263 | 179 | 132 | 212 |
| A72-b | 212 | 263 | 179 | 132 | 212 |
| A72-c | 212 | 263 | 179 | 132 | 212 |
| A72-d | 212 | 263 | 179 | 132 | 212 |
| A75-a | 212 | 263 | 179 | 132 | 212 |
| A75-b | 212 | 263 | 179 | 132 | 212 |
| A75-c | 212 | 263 | 179 | 132 | 212 |
| A76-a | 212 | 263 | 179 | 132 | 212 |
| A76-b | 212 | 263 | 179 | 132 | 212 |
| A76-c | 212 | 263 | 179 | 132 | 212 |
| A77-a | 212 | 263 | 179 | 132 | 212 |
| A77-b | 212 | 263 | 179 | 132 | 212 |
| A80-a | 179 | 206 | 197 | 126 | 221 |
| A80-b | 179 | 206 | 179 | 126 | 221 |
| A81-a | 203 | 254 | 176 | 132 | 224 |
| A82-a | 212 | 242 | 179 | 132 | 224 |
| A82-b | 212 | 242 | 179 | 132 | 224 |
| A83   | 212 | 257 | 179 | 132 | 224 |
| A84-a | 203 | 242 | 176 | 132 | 212 |
| A84-b | 212 | 248 | 176 | 132 | 221 |
| A84-c | 212 | 248 | 176 | 132 | 224 |
| A85   | 203 | 242 | 176 | 132 | 224 |
| A86-a | 212 | 257 | 179 | 132 | 224 |
| A86-b | 179 | 206 | 197 | 126 | 221 |
| A86-c | 194 | 257 | 176 | 132 | 224 |
| A86-d | 212 | 242 | 176 | 132 | 212 |
| A86-e | 212 | 242 | 173 | 132 | 224 |
| A87-a | 221 | 242 | 179 | 132 | 230 |
| A87-b | 221 | 242 | 179 | 132 | 230 |
| A87-c | 194 | 257 | 176 | 132 | 224 |
| A87-d | 221 | 242 | 179 | 132 | 230 |
| A88-a | 212 | 242 | 179 | 132 | 224 |
| A88-b | 212 | 257 | 179 | 132 | 224 |
| A88-c | 212 | 242 | 176 | 132 | 212 |
| A88-d | 212 | 242 | 179 | 132 | 224 |

|        |     |     |     |     |     |
|--------|-----|-----|-----|-----|-----|
| A89-a  | 212 | 242 | 173 | 132 | 224 |
| A89-b  | 212 | 242 | 173 | 132 | 224 |
| A89-c  | 212 | 257 | 179 | 132 | 224 |
| A89-d  | 212 | 242 | 173 | 132 | 224 |
| A90-c  | 212 | 242 | 176 | 132 | 212 |
| A90-d  | 212 | 242 | 176 | 132 | 212 |
| A91-a  | 212 | 242 | 173 | 132 | 224 |
| A91-b  | 212 | 242 | 173 | 132 | 224 |
| A91-c  | 194 | 257 | 176 | 132 | 224 |
| A91-d  | 212 | 242 | 173 | 132 | 224 |
| A92-a  | 194 | 254 | 179 | 132 | 242 |
| A92-b  | 194 | 254 | 179 | 132 | 242 |
| A92-c  | 194 | 254 | 179 | 132 | 242 |
| A92-d  | 194 | 254 | 179 | 132 | 242 |
| A92-e  | 194 | 254 | 179 | 132 | 242 |
| A94-a  | 194 | 272 | 179 | 132 | 239 |
| A96-a  | 194 | 272 | 179 | 132 | 239 |
| A96-b  | 194 | 272 | 179 | 132 | 239 |
| A96-c  | 194 | 272 | 179 | 132 | 239 |
| A96-d  | 194 | 272 | 179 | 132 | 239 |
| A97    | 194 | 242 | 176 | 132 | 239 |
| A99    | 188 | 206 | 176 | 126 | 221 |
| A101   | 194 | 242 | 176 | 132 | 212 |
| A102-a | 212 | 257 | 176 | 132 | 224 |
| A102-b | 212 | 257 | 176 | 132 | 224 |
| A102-c | 212 | 257 | 176 | 132 | 224 |
| A103   | 194 | 272 | 179 | 132 | 239 |
| A104-a | 185 | 209 | 149 | 132 | 215 |
| A104-b | 212 | 257 | 176 | 132 | 224 |
| A104-c | 212 | 257 | 176 | 132 | 224 |
| A105   | 185 | 209 | 149 | 132 | 215 |
| A108-a | 212 | 254 | 176 | 132 | 212 |
| A108-b | 212 | 254 | 176 | 132 | 212 |
| A108-d | 212 | 254 | 176 | 132 | 212 |
| A109-e | 188 | 206 | 197 | 126 | 221 |
| A110-b | 188 | 206 | 176 | 126 | 221 |
| A110-c | 212 | 269 | 179 | 132 | 224 |
| A110-d | 212 | 269 | 179 | 132 | 224 |
| A111-a | 212 | 269 | 179 | 132 | 224 |
| A111-b | 188 | 206 | 179 | 126 | 221 |
| A113-a | 212 | 269 | 179 | 132 | 224 |
| A113-b | 212 | 269 | 179 | 132 | 224 |
| A115   | 212 | 254 | 176 | 132 | 212 |
| A120   | 194 | 269 | 179 | 132 | 239 |

***Ampelomyces* strains isolated from apple powdery mildew (*Podosphaera leucotricha*)**

|     |     |     |     |     |     |
|-----|-----|-----|-----|-----|-----|
| B5  | 176 | 242 | 176 | 138 | 206 |
| B6  | 176 | 242 | 176 | 138 | 206 |
| B15 | 176 | 242 | 176 | 138 | 206 |
| B26 | 176 | 242 | 176 | 138 | 206 |

|                |     |     |     |     |     |
|----------------|-----|-----|-----|-----|-----|
| B33 (MYA-3395) | 176 | 242 | 176 | 138 | 206 |
| B34 (MYA-3396) | 176 | 242 | 176 | 138 | 206 |
| B37            | 176 | 242 | 176 | 138 | 206 |
| B38            | 176 | 242 | 176 | 138 | 206 |
| B41            | 176 | 242 | 176 | 138 | 206 |
| B42            | 176 | 242 | 158 | 138 | 209 |
| B46            | 176 | 242 | 176 | 138 | 206 |
| B58            | 176 | 242 | 176 | 138 | 206 |
| B59            | 176 | 242 | 176 | 138 | 206 |
| B60            | 176 | 242 | 176 | 138 | 206 |
| B61            | 176 | 242 | 179 | 138 | 206 |
| B62            | 176 | 242 | 176 | 138 | 206 |
| B63            | 176 | 242 | 176 | 138 | 206 |
| B64            | 176 | 242 | 179 | 138 | 206 |
| B65            | 176 | 242 | 176 | 138 | 206 |
| B66            | 176 | 242 | 176 | 138 | 206 |
| B67            | 176 | 242 | 176 | 138 | 206 |
| B68            | 176 | 242 | 158 | 138 | 209 |
| B69            | 176 | 242 | 176 | 138 | 206 |
| B70            | 176 | 242 | 176 | 138 | 206 |
| B71            | 176 | 242 | 176 | 138 | 206 |
| B72            | 176 | 242 | 158 | 138 | 209 |
| B74            | 176 | 242 | 158 | 138 | 209 |
| B75            | 176 | 242 | 176 | 138 | 206 |
| B76            | 176 | 242 | 179 | 138 | 206 |
| B77            | 176 | 242 | 179 | 138 | 206 |
| B79            | 176 | 242 | 176 | 138 | 206 |
| B80            | 176 | 242 | 176 | 138 | 206 |
| B82            | 176 | 242 | 158 | 138 | 206 |
| B83            | 176 | 242 | 176 | 138 | 206 |
| B84            | 176 | 242 | 176 | 138 | 206 |
| B85            | 176 | 242 | 176 | 138 | 206 |
| B86            | 176 | 242 | 176 | 138 | 206 |
| B87            | 176 | 242 | 176 | 138 | 206 |
| B89            | 176 | 242 | 176 | 138 | 206 |
| B90            | 176 | 242 | 176 | 138 | 206 |
| B91            | 176 | 242 | 158 | 138 | 209 |
| B92            | 176 | 242 | 179 | 138 | 206 |
| B94            | 176 | 242 | 158 | 138 | 209 |
| B95            | 176 | 242 | 158 | 138 | 209 |
| B97            | 176 | 242 | 158 | 138 | 209 |
| B99            | 176 | 242 | 158 | 138 | 209 |
| B100           | 176 | 242 | 176 | 138 | 206 |
| B101           | 176 | 242 | 176 | 138 | 209 |
| B103           | 176 | 242 | 158 | 138 | 209 |
| B105           | 176 | 242 | 176 | 138 | 206 |
| B106           | 176 | 242 | 176 | 138 | 206 |
| B107           | 176 | 242 | 176 | 138 | 206 |
| B108           | 176 | 242 | 176 | 138 | 206 |
| B109           | 176 | 242 | 158 | 138 | 209 |

|        |     |     |     |     |     |
|--------|-----|-----|-----|-----|-----|
| B110   | 176 | 242 | 158 | 138 | 209 |
| B111   | 176 | 242 | 158 | 138 | 209 |
| B114   | 176 | 242 | 176 | 138 | 206 |
| B115   | 176 | 242 | 176 | 138 | 206 |
| B116   | 176 | 242 | 158 | 138 | 206 |
| B118   | 176 | 242 | 176 | 138 | 206 |
| B119-a | 176 | 242 | 176 | 138 | 206 |
| B119-b | 176 | 242 | 176 | 138 | 206 |
| B120-b | 176 | 242 | 176 | 138 | 206 |
| B121-a | 176 | 242 | 176 | 138 | 206 |
| B121-b | 176 | 242 | 176 | 138 | 206 |
| B122-a | 176 | 242 | 176 | 138 | 206 |
| B122-b | 176 | 242 | 176 | 138 | 206 |
| B123-a | 176 | 242 | 176 | 138 | 206 |
| B124-a | 176 | 242 | 176 | 138 | 206 |
| B124-b | 176 | 242 | 176 | 138 | 206 |
| B125-a | 176 | 242 | 158 | 138 | 209 |
| B125-b | 176 | 242 | 158 | 138 | 209 |
| B126-a | 176 | 242 | 158 | 138 | 206 |
| B126-b | 176 | 242 | 158 | 138 | 206 |
| B127-a | 176 | 242 | 176 | 138 | 206 |
| B127-b | 176 | 242 | 176 | 138 | 206 |
| B128-a | 176 | 242 | 176 | 138 | 206 |
| B128-b | 176 | 242 | 176 | 138 | 206 |
| B129   | 176 | 242 | 158 | 138 | 209 |
| B130-a | 176 | 242 | 176 | 138 | 206 |
| B130-b | 176 | 242 | 176 | 138 | 206 |
| B131   | 176 | 242 | 158 | 138 | 206 |
| B132-a | 176 | 242 | 158 | 138 | 206 |
| B132-b | 176 | 242 | 158 | 138 | 206 |
| B133   | 176 | 242 | 176 | 138 | 206 |
| B135   | 176 | 242 | 158 | 138 | 206 |
| B136-a | 176 | 242 | 158 | 138 | 206 |
| B136-b | 176 | 242 | 158 | 138 | 206 |
| B137   | 176 | 242 | 176 | 138 | 209 |
| B138-a | 176 | 242 | 176 | 138 | 209 |
| B138-b | 176 | 242 | 176 | 138 | 209 |
| B140-a | 176 | 242 | 176 | 138 | 209 |
| B140-b | 176 | 242 | 176 | 138 | 209 |
| B141-a | 176 | 242 | 176 | 138 | 209 |
| B141-b | 176 | 242 | 176 | 138 | 209 |
| B141-c | 176 | 242 | 176 | 138 | 209 |
| B141-d | 176 | 242 | 176 | 138 | 209 |
| B141-e | 176 | 242 | 176 | 138 | 209 |
| B143   | 176 | 242 | 176 | 138 | 209 |
| B144-a | 176 | 242 | 176 | 138 | 209 |
| B144-b | 176 | 242 | 176 | 138 | 209 |
| B146   | 176 | 242 | 176 | 138 | 209 |
| B147   | 176 | 242 | 176 | 138 | 209 |
| B148   | 176 | 242 | 176 | 138 | 209 |

|        |     |     |     |     |     |
|--------|-----|-----|-----|-----|-----|
| B149-a | 176 | 242 | 176 | 138 | 209 |
| B149-b | 176 | 242 | 176 | 138 | 209 |
| B150-a | 176 | 242 | 176 | 138 | 206 |
| B150-b | 176 | 242 | 176 | 138 | 206 |
| B150-c | 176 | 242 | 176 | 138 | 206 |
| B151-a | 176 | 242 | 176 | 138 | 209 |
| B151-b | 176 | 242 | 176 | 138 | 209 |
| B151-c | 176 | 242 | 176 | 138 | 209 |
| B152-a | 176 | 242 | 176 | 138 | 209 |
| B152-b | 176 | 242 | 176 | 138 | 209 |
| B153-a | 176 | 242 | 158 | 138 | 206 |
| B153-b | 176 | 242 | 158 | 138 | 206 |
| B154   | 176 | 242 | 158 | 138 | 209 |
| B155   | 176 | 242 | 176 | 138 | 206 |
| B156-b | 176 | 242 | 176 | 138 | 206 |
| B157-a | 176 | 242 | 176 | 138 | 206 |
| B157-b | 176 | 242 | 158 | 138 | 209 |
| B158-a | 176 | 242 | 176 | 138 | 206 |
| B158-b | 176 | 242 | 176 | 138 | 206 |
| B158-c | 176 | 242 | 176 | 138 | 206 |
| B158-d | 176 | 242 | 176 | 138 | 206 |
| B159-a | 176 | 242 | 176 | 138 | 206 |
| B159-b | 176 | 242 | 158 | 138 | 206 |
| B160-b | 176 | 242 | 176 | 138 | 206 |
| B161   | 176 | 242 | 158 | 138 | 206 |
| B162-b | 176 | 242 | 158 | 138 | 209 |
| B163-a | 176 | 242 | 158 | 138 | 209 |
| B163-b | 176 | 242 | 158 | 138 | 209 |
| B164-a | 176 | 242 | 176 | 138 | 206 |
| B164-b | 176 | 242 | 176 | 138 | 206 |
| B165   | 176 | 242 | 176 | 138 | 206 |
| B167-a | 176 | 242 | 176 | 138 | 206 |
| B167-b | 176 | 242 | 158 | 138 | 209 |
| B168   | 176 | 242 | 176 | 138 | 206 |
| B169-b | 176 | 242 | 176 | 138 | 206 |
| B170-a | 176 | 242 | 176 | 138 | 206 |
| B171-b | 176 | 242 | 158 | 138 | 209 |
| B172-a | 176 | 242 | 158 | 138 | 206 |
| B175   | 176 | 242 | 176 | 138 | 206 |
| B176   | 176 | 242 | 176 | 138 | 206 |
| B177-b | 176 | 242 | 176 | 138 | 206 |
| B179-a | 176 | 242 | 158 | 138 | 209 |
| B179-b | 176 | 242 | 158 | 138 | 209 |
| B180-b | 176 | 242 | 158 | 138 | 209 |
| B181-b | 176 | 242 | 158 | 138 | 209 |
| B182   | 176 | 242 | 158 | 138 | 206 |
| B183   | 176 | 242 | 176 | 138 | 206 |
| B184-b | 176 | 242 | 158 | 138 | 206 |
| B185   | 176 | 242 | 158 | 138 | 206 |
| B186-a | 176 | 242 | 176 | 138 | 209 |

|        |     |     |     |     |     |
|--------|-----|-----|-----|-----|-----|
| B186-b | 176 | 242 | 176 | 138 | 209 |
| B187-a | 176 | 242 | 176 | 138 | 203 |
| B187-b | 176 | 242 | 158 | 138 | 206 |
| B188   | 176 | 242 | 176 | 135 | 206 |
| B189   | 176 | 242 | 176 | 135 | 206 |
| B190   | 176 | 242 | 158 | 138 | 206 |
| B191-a | 176 | 242 | 176 | 138 | 206 |
| B191-b | 176 | 242 | 176 | 138 | 206 |
| B192   | 176 | 242 | 176 | 138 | 206 |
| B193   | 176 | 242 | 176 | 138 | 206 |
| B194   | 176 | 242 | 176 | 138 | 206 |
| B195   | 176 | 242 | 176 | 138 | 206 |
| B196   | 176 | 242 | 176 | 138 | 206 |
| B197   | 176 | 242 | 158 | 138 | 209 |
| B198   | 176 | 242 | 176 | 138 | 206 |
| B199   | 176 | 242 | 176 | 138 | 206 |
| B200   | 176 | 242 | 176 | 138 | 206 |
| B201   | 176 | 242 | 158 | 138 | 209 |
| B202   | 176 | 242 | 176 | 138 | 206 |
| B203   | 176 | 242 | 158 | 138 | 206 |
| B204   | 176 | 242 | 176 | 138 | 206 |
| B205   | 176 | 242 | 176 | 138 | 206 |
| B206   | 176 | 242 | 158 | 138 | 206 |
| B207-a | 176 | 242 | 179 | 138 | 206 |
| B207-b | 176 | 242 | 179 | 138 | 206 |
| B209-a | 176 | 242 | 179 | 138 | 206 |
| B209-b | 176 | 242 | 179 | 138 | 206 |
| B210   | 176 | 242 | 179 | 138 | 206 |
| B211   | 176 | 242 | 176 | 138 | 206 |
| B212-a | 176 | 242 | 176 | 138 | 206 |
| B212-b | 176 | 242 | 176 | 138 | 206 |
| B213   | 176 | 242 | 179 | 138 | 206 |
| B214-a | 176 | 242 | 179 | 138 | 206 |
| B214-b | 176 | 242 | 179 | 138 | 206 |
| B215   | 176 | 242 | 179 | 138 | 206 |
| B216   | 176 | 242 | 176 | 138 | 206 |
| B217-a | 176 | 242 | 176 | 138 | 206 |
| B217-b | 176 | 242 | 179 | 138 | 206 |
| B218-a | 176 | 242 | 179 | 138 | 206 |
| B218-b | 176 | 242 | 179 | 138 | 206 |
| B219-a | 176 | 242 | 179 | 138 | 206 |
| B219-b | 176 | 242 | 179 | 138 | 206 |
| B219-c | 176 | 242 | 179 | 138 | 206 |
| B220-a | 176 | 242 | 179 | 138 | 206 |
| B220-b | 176 | 242 | 176 | 138 | 206 |
| B221   | 176 | 242 | 179 | 138 | 206 |
| B222-a | 176 | 242 | 176 | 138 | 206 |
| B222-b | 176 | 242 | 176 | 138 | 206 |
| B223-a | 176 | 242 | 176 | 138 | 206 |
| B223-b | 176 | 242 | 176 | 138 | 206 |



|        |     |     |     |     |     |
|--------|-----|-----|-----|-----|-----|
| B224-a | 176 | 242 | 179 | 138 | 206 |
| B225-a | 176 | 242 | 179 | 138 | 206 |
| B225-b | 176 | 242 | 179 | 138 | 206 |
| B226-a | 176 | 242 | 179 | 138 | 206 |
| B226-b | 176 | 242 | 179 | 138 | 206 |
| B227-a | 176 | 242 | 176 | 138 | 206 |
| B227-b | 176 | 242 | 179 | 138 | 206 |
| B228   | 176 | 242 | 176 | 138 | 206 |
| B229-a | 176 | 242 | 179 | 138 | 206 |
| B229-b | 176 | 242 | 179 | 138 | 206 |
| B230-a | 176 | 242 | 179 | 138 | 206 |
| B230-b | 176 | 242 | 179 | 138 | 206 |
| B231   | 176 | 242 | 179 | 138 | 206 |
| B234   | 176 | 242 | 179 | 138 | 206 |
| B235   | 176 | 242 | 179 | 138 | 206 |
| B236-a | 176 | 242 | 176 | 138 | 206 |
| B236-b | 176 | 242 | 176 | 138 | 206 |
| B237-a | 176 | 242 | 179 | 138 | 206 |
| B237-b | 176 | 242 | 179 | 138 | 206 |
| B239-a | 176 | 242 | 179 | 138 | 206 |
| B239-b | 176 | 242 | 179 | 138 | 206 |
| B240-a | 176 | 242 | 176 | 138 | 206 |
| B240-b | 176 | 242 | 176 | 138 | 206 |
| B242   | 176 | 242 | 176 | 138 | 206 |
| B244-a | 176 | 242 | 176 | 138 | 206 |
| B244-b | 176 | 242 | 176 | 138 | 206 |
| B245   | 176 | 242 | 176 | 138 | 209 |
| B246   | 176 | 242 | 176 | 138 | 206 |

**Powdery mildew-infected apple leaf samples with *Ampelomyces***

|     |     |     |     |     |     |
|-----|-----|-----|-----|-----|-----|
| b13 | 176 | 254 | 176 | 138 | 206 |
| b20 | 176 | 254 | 176 | 138 | 206 |
| b25 | 176 | 254 | 158 | 138 | 206 |
| b26 | 176 | 254 | 158 | 138 | 206 |
| b27 | 176 | 242 | 176 | 138 | 206 |
| b30 | 176 | 242 | 176 | 138 | 206 |
| b31 | 176 | 242 | 176 | 138 | 206 |
| b33 | 176 | 242 | 158 | 138 | 206 |
| b34 | 176 | 242 | 176 | 138 | 206 |
| b35 | 176 | 242 | 176 | 138 | 206 |
| b36 | 176 | 242 | 176 | 138 | 206 |
| b41 | 176 | 254 | 158 | 138 | 206 |
| b44 | 176 | 254 | 176 | 138 | 206 |
| b46 | 176 | 254 | 176 | 138 | 206 |
| b49 | 176 | 254 | 158 | 138 | 206 |
| b51 | 176 | 242 | 176 | 138 | 206 |
| b52 | 176 | 254 | 176 | 138 | 206 |
| b55 | 176 | 254 | 176 | 138 | 206 |
| b58 | 176 | 254 | 176 | 138 | 206 |
| b59 | 176 | 254 | 176 | 138 | 206 |

|      |     |     |     |     |     |
|------|-----|-----|-----|-----|-----|
| b60  | 176 | 254 | 176 | 138 | 206 |
| b62  | 176 | 242 | 176 | 138 | 206 |
| b65  | 176 | 254 | 176 | 138 | 206 |
| b66  | 176 | 254 | 176 | 138 | 206 |
| b69  | 176 | 254 | 176 | 138 | 206 |
| b74  | 176 | 254 | 176 | 138 | 206 |
| b76  | 176 | 254 | 176 | 138 | 206 |
| b79  | 176 | 254 | 176 | 138 | 206 |
| b81  | 176 | 254 | 176 | 138 | 206 |
| b85  | 176 | 254 | 176 | 138 | 206 |
| b87  | 176 | 254 | 176 | 138 | 206 |
| b88  | 176 | 254 | 176 | 138 | 206 |
| b92  | 176 | 254 | 158 | 138 | 209 |
| b94  | 176 | 254 | 158 | 138 | 209 |
| b96  | 176 | 254 | 176 | 138 | 206 |
| b98  | 176 | 254 | 176 | 138 | 206 |
| b99  | 176 | 254 | 176 | 138 | 206 |
| b100 | 176 | 254 | 176 | 138 | 206 |
| b102 | 176 | 254 | 176 | 138 | 206 |
| b107 | 176 | 254 | 176 | 138 | 206 |
| b110 | 176 | 254 | 176 | 138 | 206 |
| b111 | 176 | 254 | 173 | 138 | 206 |
| b113 | 176 | 254 | 176 | 138 | 206 |
| b117 | 176 | 254 | 176 | 138 | 206 |
| b119 | 176 | 254 | 173 | 138 | 206 |
| b121 | 176 | 254 | 176 | 138 | 206 |
| b122 | 176 | 254 | 176 | 138 | 206 |
| b123 | 176 | 254 | 176 | 138 | 206 |
| b124 | 176 | 254 | 176 | 138 | 206 |
| b125 | 176 | 254 | 176 | 138 | 206 |
| b128 | 176 | 257 | 176 | 138 | 206 |
| b129 | 176 | 254 | 176 | 138 | 206 |
| b130 | 176 | 254 | 176 | 138 | 206 |
| b131 | 176 | 254 | 176 | 138 | 206 |
| b132 | 176 | 254 | 176 | 138 | 206 |
| b133 | 176 | 254 | 176 | 138 | 206 |
| b134 | 176 | 254 | 176 | 138 | 206 |
| b137 | 176 | 254 | 176 | 138 | 206 |
| b139 | 176 | 254 | 176 | 138 | 206 |
| b140 | 176 | 254 | 176 | 138 | 206 |
| b143 | 176 | 254 | 158 | 138 | 209 |
| b144 | 176 | 254 | 176 | 138 | 206 |
| b146 | 176 | 242 | 158 | 138 | 206 |
| b147 | 176 | 254 | 158 | 138 | 209 |
| b153 | 176 | 254 | 176 | 138 | 206 |
| b154 | 176 | 254 | 176 | 138 | 206 |
| b155 | 176 | 254 | 158 | 138 | 209 |
| b157 | 176 | 254 | 158 | 138 | 206 |
| b164 | 176 | 254 | 176 | 138 | 206 |
| b166 | 176 | 254 | 158 | 138 | 206 |

|      |     |     |     |     |     |
|------|-----|-----|-----|-----|-----|
| b167 | 176 | 254 | 176 | 138 | 206 |
| b169 | 176 | 254 | 179 | 138 | 206 |
| b170 | 176 | 254 | 176 | 138 | 206 |
| b171 | 176 | 254 | 179 | 138 | 206 |
| b174 | 176 | 254 | 179 | 138 | 206 |
| b175 | 176 | 254 | 176 | 138 | 206 |
| b177 | 176 | 254 | 179 | 138 | 206 |
| b178 | 176 | 254 | 176 | 138 | 206 |
| b182 | 176 | 254 | 176 | 138 | 206 |
| b183 | 176 | 254 | 176 | 138 | 206 |
| b185 | 176 | 254 | 179 | 138 | 206 |
| b186 | 176 | 254 | 176 | 138 | 206 |
| b190 | 176 | 254 | 179 | 138 | 206 |
| b192 | 176 | 254 | 176 | 138 | 206 |
| b193 | 176 | 254 | 176 | 138 | 206 |
| b195 | 176 | 254 | 176 | 138 | 206 |
| b196 | 176 | 254 | 176 | 138 | 206 |
| b197 | 176 | 254 | 176 | 138 | 206 |
| b199 | 176 | 254 | 176 | 138 | 206 |
| b201 | 176 | 254 | 176 | 138 | 206 |
| b205 | 176 | 254 | 176 | 138 | 206 |
| b206 | 176 | 254 | 176 | 138 | 206 |
| b207 | 176 | 254 | 176 | 138 | 206 |
| b209 | 176 | 254 | 176 | 138 | 206 |
| b210 | 176 | 254 | 176 | 138 | 206 |
| b211 | 176 | 254 | 176 | 138 | 206 |
| b212 | 176 | 254 | 179 | 138 | 206 |
| b217 | 176 | 254 | 179 | 138 | 206 |
| b218 | 176 | 254 | 179 | 138 | 206 |
| b219 | 176 | 254 | 179 | 138 | 206 |
| b220 | 176 | 254 | 176 | 138 | 206 |
| b222 | 176 | 254 | 179 | 138 | 206 |
| b223 | 176 | 254 | 179 | 138 | 206 |
| b225 | 176 | 254 | 179 | 138 | 206 |
| b226 | 176 | 254 | 179 | 138 | 206 |
| b227 | 176 | 254 | 179 | 138 | 206 |
| b228 | 176 | 254 | 179 | 138 | 206 |
| b229 | 176 | 254 | 179 | 138 | 206 |
| b230 | 176 | 254 | 179 | 138 | 206 |
| b231 | 176 | 254 | 179 | 138 | 206 |
| b232 | 176 | 254 | 179 | 138 | 206 |
| b233 | 176 | 254 | 176 | 138 | 206 |
| b234 | 176 | 254 | 176 | 138 | 206 |
| b235 | 176 | 254 | 176 | 138 | 206 |
| b236 | 176 | 254 | 176 | 138 | 206 |
| b237 | 176 | 254 | 176 | 138 | 206 |
| b238 | 176 | 254 | 176 | 138 | 206 |
| b241 | 176 | 242 | 176 | 138 | 206 |
| b242 | 176 | 266 | 176 | 138 | 206 |
| b243 | 176 | 242 | 176 | 138 | 206 |

|        |     |     |     |     |     |
|--------|-----|-----|-----|-----|-----|
| b244   | 176 | 242 | 176 | 138 | 206 |
| b245   | 176 | 242 | 176 | 138 | 206 |
| b246   | 176 | 242 | 176 | 138 | 206 |
| b248   | 176 | 263 | 176 | 138 | 206 |
| b249   | 176 | 254 | 176 | 138 | 206 |
| b250   | 176 | 254 | 176 | 138 | 206 |
| b251   | 176 | 254 | 176 | 138 | 206 |
| b252   | 176 | 254 | 176 | 138 | 206 |
| b253   | 176 | 254 | 176 | 138 | 206 |
| b256   | 176 | 254 | 176 | 138 | 206 |
| b257   | 176 | 254 | 176 | 138 | 206 |
| b258   | 176 | 254 | 176 | 138 | 206 |
| b261   | 176 | 242 | 176 | 138 | 206 |
| b263   | 176 | 263 | 176 | 138 | 206 |
| b266   | 176 | 242 | 176 | 138 | 206 |
| b267   | 176 | 242 | 176 | 138 | 206 |
| b268   | 176 | 242 | 176 | 138 | 206 |
| b269   | 176 | 242 | 176 | 138 | 206 |
| b271   | 176 | 242 | 176 | 138 | 206 |
| b273   | 176 | 254 | 176 | 138 | 206 |
| b275   | 176 | 242 | 176 | 138 | 206 |
| b282-a | 176 | 254 | 176 | 138 | 206 |
| b285-a | 176 | 254 | 158 | 138 | 206 |
| b287-a | 176 | 254 | 176 | 138 | 206 |
| b288-c | 176 | 254 | 176 | 138 | 206 |
| b291   | 176 | 254 | 176 | 138 | 206 |
| b297   | 176 | 242 | 176 | 138 | 209 |
| b299   | 176 | 254 | 176 | 138 | 206 |
| b301   | 176 | 242 | 176 | 138 | 206 |
| b304   | 176 | 242 | 176 | 138 | 206 |
| b307   | 176 | 254 | 176 | 138 | 206 |
| b310   | 176 | 242 | 158 | 138 | 206 |
| b315   | 176 | 254 | 158 | 138 | 206 |
| b318   | 176 | 242 | 158 | 138 | 206 |
| b324   | 176 | 242 | 158 | 138 | 206 |
| b326   | 176 | 254 | 158 | 138 | 206 |
| b331   | 176 | 242 | 158 | 138 | 206 |
| b333   | 176 | 254 | 158 | 138 | 206 |
| b339   | 176 | 254 | 158 | 138 | 206 |
| b342   | 176 | 254 | 158 | 138 | 206 |
| b344   | 176 | 254 | 158 | 138 | 206 |
| b346   | 176 | 242 | 158 | 138 | 206 |

**Ampelomyces strains isolated from other powdery mildew species**

|       |     |     |     |     |     |
|-------|-----|-----|-----|-----|-----|
| BV2   | 194 | 254 | 173 | 132 | 239 |
| BV4-b | 194 | 254 | 179 | 132 | 239 |
| BV4-c | 194 | 254 | 179 | 132 | 239 |
| RA1-b | 194 | 269 | 179 | 132 | 239 |
| RA2-a | 194 | 296 | 179 | 132 | 230 |
| RA2-d | 194 | 269 | 179 | 132 | 230 |

|          |     |     |     |     |     |
|----------|-----|-----|-----|-----|-----|
| MA1-c    | 194 | 254 | 179 | 132 | 239 |
| MA5      | 194 | 257 | 179 | 132 | 239 |
| MA6-b    | 194 | 254 | 179 | 132 | 239 |
| MA7-a    | 194 | 257 | 179 | 132 | 239 |
| MA7-b    | 194 | 257 | 179 | 132 | 239 |
| MA8      | 194 | 254 | 179 | 132 | 239 |
| MA-H     | 194 | 254 | 179 | 132 | 239 |
| RS1-a    | 194 | 239 | 179 | 132 | 239 |
| RS2-a    | 194 | 239 | 179 | 132 | 239 |
| RS2-b    | 194 | 239 | 179 | 132 | 239 |
| RS3-a    | 194 | 239 | 179 | 132 | 239 |
| RS3-b    | 194 | 239 | 179 | 132 | 239 |
| PN1-a    | 194 | 266 | 179 | 132 | 239 |
| PN2      | 194 | 272 | 179 | 132 | 239 |
| PN3      | 194 | 272 | 179 | 132 | 236 |
| PN4-a    | 194 | 272 | 179 | 132 | 236 |
| PN4-b    | 194 | 272 | 179 | 132 | 236 |
| XL1-a    | 203 | 263 | 176 | 132 | 221 |
| XL1-b    | 203 | 263 | 176 | 132 | 221 |
| XL2-b    | 212 | 257 | 179 | 132 | 221 |
| XL3-a    | 212 | 257 | 179 | 132 | 221 |
| XL3-b    | 212 | 257 | 179 | 132 | 221 |
| XL4-a    | 212 | 257 | 179 | 132 | 221 |
| XL4-b    | 179 | 257 | 179 | 132 | 221 |
| XL4-c    | 212 | 257 | 179 | 132 | 221 |
| LV2-b    | 194 | 242 | 176 | 132 | 236 |
| TP1      | 194 | 239 | 176 | 132 | 230 |
| TP3      | 194 | 272 | 176 | 132 | 239 |
| TP4      | 194 | 290 | 179 | 132 | 239 |
| TP5      | 194 | 242 | 179 | 132 | 239 |
| TR1      | 194 | 272 | 179 | 132 | 239 |
| H14      | 194 | 239 | 176 | 132 | 230 |
| GS1      | 194 | 242 | 176 | 132 | 239 |
| GY-a     | 194 | 278 | 179 | 132 | 203 |
| GY-b     | 194 | 278 | 179 | 132 | 203 |
| GY-c     | 194 | 278 | 179 | 132 | 203 |
| GL       | 194 | 242 | 179 | 132 | 239 |
| ALA1-a   | 194 | 257 | 176 | 132 | 251 |
| Aq SA    | 194 | 269 | 170 | 132 | 245 |
| HMLAC226 | 194 | 239 | 176 | 132 | 221 |
| G2       | 194 | 281 | 179 | 132 | 230 |
| DSM2222  | 194 | 239 | 176 | 132 | 230 |
| AQ10     | 194 | 245 | 182 | 132 | 242 |
| GYER     | 176 | 206 | 179 | 126 | 224 |
| GW       | 176 | 242 | 179 | 138 | 206 |

***Powdery mildew-infected leaf samples, other than apple leaves, containing Ampelomyces pycnidia***

|      |     |     |     |     |     |
|------|-----|-----|-----|-----|-----|
| tp2  | 194 | 239 | 179 | 132 | 239 |
| tp13 | 194 | 239 | 176 | 132 | 230 |
| tp20 | 194 | 272 | 179 | 132 | 230 |

|      |     |     |     |     |     |
|------|-----|-----|-----|-----|-----|
| tp21 | 194 | 242 | 179 | 132 | 239 |
| tp24 | 194 | 272 | 176 | 132 | 239 |
| tp25 | 194 | 302 | 179 | 132 | 239 |
