# Supplementary material for: Host Phenology and Geography as Drivers of Differentiation in Generalist Fungal Mycoparasites
Source: PubMed Central journal article supplement (PMC4372539; doi:10.1371/journal.pone.0120703), 2015-03-24
Supplement: pone.0120703.s007.pdf [file pone.0120703.s007.pdf]

Table S3: genotypes of *Ampelomyces* strains isolated from different mycohosts in autumn, genotyped with eight microsatellite markers

|                                                                                                                       | Lk3c | Lk7d | Lk7c | Lk3a | Lk10c | Lk3b | Lk7f | Lk10d |
|-----------------------------------------------------------------------------------------------------------------------|------|------|------|------|-------|------|------|-------|
| <b><i>Ampelomyces</i> strains isolated from grass powdery mildew (<i>Blumeria graminis</i>)</b>                       |      |      |      |      |       |      |      |       |
| BgrA                                                                                                                  | 155  | 152  | 194  | 269  | 179   | 132  | 195  | 239   |
| BgrB                                                                                                                  | 155  | 152  | 194  | 269  | 179   | 132  | 195  | 239   |
| BgrC                                                                                                                  | 155  | 152  | 194  | 269  | 179   | 132  | 195  | 239   |
| BgrD                                                                                                                  | 155  | 152  | 194  | 269  | 179   | 132  | 195  | 239   |
| BgrE                                                                                                                  | 155  | 152  | 194  | 269  | 179   | 132  | 195  | 239   |
| BgrF                                                                                                                  | 155  | 152  | 194  | 269  | 179   | 132  | 195  | 239   |
| BgrG                                                                                                                  | 155  | 152  | 194  | 269  | 179   | 132  | 195  | 239   |
| BgrH                                                                                                                  | 155  | 152  | 194  | 269  | 179   | 132  | 195  | 239   |
| BgrI                                                                                                                  | 104  | 170  | 194  | 296  | 149   | 132  | 209  | 200   |
| KACC 43563                                                                                                            | 155  | 152  | 176  | 269  | 179   | 132  | 195  | 239   |
| KACC 44850                                                                                                            | 104  | 158  | 176  | 296  | 182   | 132  | 195  | 203   |
| KACC 44851                                                                                                            | 155  | 152  | 194  | 269  | 179   | 132  | 195  | 239   |
| <b><i>Ampelomyces</i> strains isolated from grapevine powdery mildew (<i>Erysiphe necator</i>)</b>                    |      |      |      |      |       |      |      |       |
| Vitis42                                                                                                               | 107  | 152  | 194  | 242  | 176   | 132  | 187  | 239   |
| Vitis55                                                                                                               | 107  | 152  | 194  | 242  | 179   | 132  | 189  | 251   |
| Vitis56                                                                                                               | 116  | 152  | 194  | 242  | 179   | 132  | 189  | 230   |
| Vitis60                                                                                                               | 107  | 152  | 194  | 254  | 179   | 132  | 195  | 239   |
| Vitis72                                                                                                               | 158  | 152  | 194  | 272  | 173   | 132  | 187  | 248   |
| Vitis76                                                                                                               | 113  | 146  | 194  | 242  | 179   | 132  | 189  | 239   |
| Vitis79                                                                                                               | 134  | 152  | 194  | 242  | 179   | 132  | 189  | 239   |
| Vitis81                                                                                                               | 161  | 152  | 194  | 254  | 179   | 132  | 189  | 239   |
| Vitis98                                                                                                               | 107  | 176  | 212  | 242  | 176   | 132  | 189  | 224   |
| SF423 (ATCC200:                                                                                                       | 107  | 176  | 176  | 236  | 176   | 132  | 189  | 188   |
| <b><i>Ampelomyces</i> strains isolated from <i>Arthrocladiella mougeotii</i> infecting <i>Lycium halimifolium</i></b> |      |      |      |      |       |      |      |       |
| A1 (ATCC201056)                                                                                                       | 107  | 176  | 212  | 242  | 179   | 132  | 249  | 212   |
| A8                                                                                                                    | 122  | 176  | 203  | 263  | 176   | 132  | 187  | 221   |
| A10-a                                                                                                                 | 122  | 176  | 212  | 263  | 179   | 132  | 185  | 221   |
| A10-c                                                                                                                 | 122  | 176  | 212  | 263  | 179   | 132  | 185  | 221   |
| A11-a                                                                                                                 | 122  | 176  | 203  | 263  | 176   | 132  | 187  | 221   |
| A11-b                                                                                                                 | 122  | 176  | 203  | 263  | 176   | 132  | 187  | 221   |
| A11-c                                                                                                                 | 122  | 176  | 203  | 263  | 176   | 132  | 187  | 221   |
| A12-a                                                                                                                 | 122  | 176  | 203  | 263  | 176   | 132  | 187  | 221   |
| A12-c                                                                                                                 | 122  | 176  | 203  | 263  | 176   | 132  | 187  | 221   |
| A13-a                                                                                                                 | 122  | 176  | 203  | 263  | 176   | 132  | 187  | 221   |
| A13-b                                                                                                                 | 122  | 176  | 203  | 263  | 176   | 132  | 187  | 221   |
| A13-c                                                                                                                 | 122  | 176  | 203  | 263  | 176   | 132  | 187  | 221   |
| A14-a                                                                                                                 | 122  | 176  | 203  | 263  | 176   | 132  | 187  | 221   |
| A14-b                                                                                                                 | 122  | 176  | 203  | 263  | 176   | 132  | 187  | 221   |
| A14-c                                                                                                                 | 122  | 176  | 203  | 263  | 176   | 132  | 187  | 221   |
| A14-d                                                                                                                 | 122  | 176  | 203  | 263  | 176   | 132  | 187  | 221   |
| A15-a                                                                                                                 | 161  | 176  | 212  | 257  | 179   | 132  | 201  | 221   |
| A17                                                                                                                   | 161  | 176  | 212  | 257  | 179   | 132  | 201  | 221   |
| A18-a                                                                                                                 | 131  | 188  | 203  | 242  | 176   | 132  | 253  | 221   |
| A19-a                                                                                                                 | 107  | 188  | 212  | 242  | 176   | 132  | 205  | 212   |

|       |     |     |     |     |     |     |     |     |
|-------|-----|-----|-----|-----|-----|-----|-----|-----|
| A19-b | 107 | 188 | 212 | 242 | 176 | 132 | 205 | 212 |
| A19-c | 107 | 188 | 212 | 242 | 176 | 132 | 205 | 212 |
| A20-a | 107 | 188 | 212 | 242 | 176 | 132 | 201 | 212 |
| A20-b | 107 | 188 | 212 | 242 | 176 | 132 | 201 | 212 |
| A20-c | 107 | 188 | 212 | 242 | 176 | 132 | 201 | 212 |
| A26   | 119 | 152 | 212 | 263 | 179 | 132 | 189 | 212 |
| A33-c | 131 | 188 | 203 | 263 | 179 | 132 | 191 | 239 |
| A33-e | 131 | 188 | 203 | 263 | 179 | 132 | 191 | 239 |
| A34-d | 131 | 188 | 203 | 263 | 179 | 132 | 191 | 239 |
| A38-c | 107 | 176 | 188 | 209 | 197 | 126 | 187 | 221 |
| A39-a | 128 | 176 | 194 | 257 | 176 | 132 | 189 | 212 |
| A39-c | 131 | 176 | 212 | 263 | 176 | 132 | 221 | 233 |
| A41-b | 128 | 176 | 194 | 257 | 176 | 132 | 189 | 212 |
| A41-c | 134 | 176 | 203 | 257 | 176 | 132 | 223 | 212 |
| A52-b | 134 | 188 | 194 | 248 | 179 | 132 | 187 | 224 |
| A53-a | 104 | 188 | 194 | 212 | 149 | 132 | 219 | 209 |
| A53-b | 104 | 188 | 194 | 212 | 149 | 132 | 199 | 209 |
| A53-c | 104 | 188 | 194 | 212 | 149 | 132 | 199 | 209 |
| A54-a | 104 | 188 | 194 | 212 | 149 | 132 | 199 | 209 |
| A54-b | 104 | 188 | 194 | 212 | 149 | 132 | 199 | 209 |
| A54-c | 104 | 188 | 194 | 212 | 149 | 132 | 219 | 209 |
| A55-a | 104 | 188 | 194 | 212 | 149 | 132 | 199 | 209 |
| A55-b | 104 | 188 | 194 | 212 | 149 | 132 | 199 | 209 |
| A55-c | 104 | 188 | 194 | 212 | 149 | 132 | 219 | 209 |
| A57-a | 113 | 152 | 194 | 242 | 179 | 132 | 189 | 239 |
| A57-b | 113 | 152 | 194 | 242 | 179 | 132 | 189 | 239 |
| A60   | 107 | 152 | 194 | 269 | 179 | 132 | 185 | 239 |
| A61-a | 158 | 152 | 194 | 269 | 179 | 132 | 185 | 239 |
| A61-b | 158 | 152 | 194 | 269 | 179 | 132 | 185 | 239 |
| A61-c | 158 | 152 | 194 | 269 | 179 | 132 | 185 | 239 |
| A62-a | 158 | 152 | 194 | 269 | 179 | 132 | 185 | 239 |
| A62-b | 158 | 152 | 194 | 269 | 179 | 132 | 185 | 239 |
| A62-c | 158 | 152 | 194 | 269 | 179 | 132 | 185 | 239 |
| A64-a | 158 | 152 | 194 | 269 | 179 | 132 | 185 | 239 |
| A64-b | 158 | 152 | 194 | 269 | 179 | 132 | 185 | 239 |
| A64-c | 158 | 152 | 194 | 269 | 179 | 132 | 185 | 239 |
| A69-a | 107 | 176 | 212 | 263 | 179 | 132 | 189 | 212 |
| A69-b | 107 | 176 | 212 | 263 | 179 | 132 | 189 | 212 |
| A70-a | 107 | 176 | 212 | 263 | 179 | 132 | 189 | 212 |
| A70-b | 107 | 176 | 212 | 263 | 179 | 132 | 189 | 212 |
| A71-a | 107 | 176 | 212 | 263 | 179 | 132 | 189 | 212 |
| A71-b | 107 | 176 | 212 | 263 | 179 | 132 | 189 | 212 |
| A72-a | 107 | 176 | 212 | 263 | 179 | 132 | 189 | 212 |
| A72-b | 107 | 176 | 212 | 263 | 179 | 132 | 189 | 212 |
| A72-c | 107 | 176 | 212 | 263 | 179 | 132 | 189 | 212 |
| A72-d | 107 | 176 | 212 | 263 | 179 | 132 | 189 | 212 |
| A75-a | 107 | 176 | 212 | 263 | 179 | 132 | 189 | 212 |
| A75-c | 107 | 176 | 212 | 263 | 179 | 132 | 189 | 212 |
| A76-a | 107 | 176 | 212 | 263 | 179 | 132 | 189 | 212 |
| A76-b | 107 | 176 | 212 | 263 | 179 | 132 | 189 | 212 |

|        |     |     |     |     |     |     |     |     |
|--------|-----|-----|-----|-----|-----|-----|-----|-----|
| A76-c  | 107 | 176 | 212 | 263 | 179 | 132 | 189 | 212 |
| A77-a  | 107 | 176 | 212 | 263 | 179 | 132 | 189 | 212 |
| A77-b  | 107 | 176 | 212 | 263 | 179 | 132 | 189 | 212 |
| A81-a  | 128 | 176 | 203 | 254 | 176 | 132 | 189 | 224 |
| A82-a  | 134 | 188 | 212 | 242 | 179 | 132 | 189 | 224 |
| A82-b  | 134 | 188 | 212 | 242 | 179 | 132 | 189 | 224 |
| A83    | 134 | 176 | 212 | 257 | 179 | 132 | 223 | 224 |
| A84-b  | 152 | 176 | 212 | 248 | 176 | 132 | 249 | 221 |
| A84-c  | 152 | 176 | 212 | 248 | 176 | 132 | 249 | 224 |
| A85    | 134 | 188 | 203 | 242 | 176 | 132 | 189 | 224 |
| A86-a  | 134 | 176 | 212 | 257 | 179 | 132 | 225 | 224 |
| A86-c  | 134 | 176 | 194 | 257 | 176 | 132 | 185 | 224 |
| A86-d  | 134 | 176 | 212 | 242 | 176 | 132 | 221 | 212 |
| A86-e  | 131 | 176 | 212 | 242 | 173 | 132 | 251 | 224 |
| A87-a  | 131 | 176 | 221 | 242 | 179 | 132 | 189 | 230 |
| A87-b  | 131 | 176 | 221 | 242 | 179 | 132 | 189 | 230 |
| A87-c  | 134 | 176 | 194 | 257 | 176 | 132 | 185 | 224 |
| A87-d  | 131 | 176 | 221 | 242 | 179 | 132 | 189 | 230 |
| A88-a  | 137 | 176 | 212 | 242 | 179 | 132 | 253 | 224 |
| A88-b  | 134 | 188 | 212 | 257 | 179 | 132 | 189 | 224 |
| A88-c  | 134 | 176 | 212 | 242 | 176 | 132 | 221 | 212 |
| A88-d  | 137 | 176 | 212 | 242 | 179 | 132 | 253 | 224 |
| A89-a  | 131 | 176 | 212 | 242 | 173 | 132 | 251 | 224 |
| A89-b  | 131 | 176 | 212 | 242 | 173 | 132 | 251 | 224 |
| A89-c  | 134 | 188 | 212 | 257 | 179 | 132 | 189 | 224 |
| A89-d  | 131 | 176 | 212 | 242 | 173 | 132 | 251 | 224 |
| A90-c  | 107 | 176 | 212 | 242 | 176 | 132 | 221 | 212 |
| A90-d  | 134 | 176 | 212 | 242 | 176 | 132 | 221 | 212 |
| A91-a  | 131 | 176 | 212 | 242 | 173 | 132 | 251 | 224 |
| A91-b  | 131 | 176 | 212 | 242 | 173 | 132 | 251 | 224 |
| A91-c  | 134 | 176 | 194 | 257 | 176 | 132 | 185 | 224 |
| A91-d  | 131 | 176 | 212 | 242 | 173 | 132 | 251 | 224 |
| A92-a  | 140 | 152 | 194 | 254 | 179 | 132 | 191 | 242 |
| A92-b  | 140 | 152 | 194 | 254 | 179 | 132 | 191 | 242 |
| A92-c  | 140 | 152 | 194 | 254 | 179 | 132 | 191 | 242 |
| A92-d  | 140 | 152 | 194 | 254 | 179 | 132 | 191 | 242 |
| A92-e  | 140 | 152 | 194 | 254 | 179 | 132 | 191 | 242 |
| A94-a  | 119 | 152 | 194 | 272 | 179 | 132 | 189 | 239 |
| A96-a  | 119 | 152 | 194 | 272 | 179 | 132 | 191 | 239 |
| A96-b  | 119 | 152 | 194 | 272 | 179 | 132 | 191 | 239 |
| A96-c  | 119 | 152 | 194 | 272 | 179 | 132 | 191 | 239 |
| A96-d  | 119 | 152 | 194 | 272 | 179 | 132 | 191 | 239 |
| A99    | 107 | 152 | 188 | 206 | 176 | 126 | 189 | 221 |
| A101   | 131 | 158 | 194 | 242 | 176 | 132 | 189 | 212 |
| A102-a | 134 | 176 | 212 | 257 | 176 | 132 | 189 | 224 |
| A102-b | 134 | 176 | 212 | 257 | 176 | 132 | 189 | 224 |
| A102-c | 134 | 176 | 212 | 257 | 176 | 132 | 189 | 224 |
| A103   | 119 | 152 | 194 | 272 | 179 | 132 | 189 | 239 |
| A104-a | 101 | 188 | 185 | 209 | 149 | 132 | 199 | 215 |
| A104-b | 134 | 176 | 212 | 257 | 176 | 132 | 189 | 224 |

|        |     |     |     |     |     |     |     |     |
|--------|-----|-----|-----|-----|-----|-----|-----|-----|
| A104-c | 134 | 176 | 212 | 257 | 176 | 132 | 189 | 224 |
| A105   | 101 | 188 | 185 | 209 | 149 | 132 | 199 | 215 |
| A108-a | 107 | 176 | 212 | 254 | 176 | 132 | 189 | 212 |
| A108-b | 107 | 176 | 212 | 254 | 176 | 132 | 189 | 212 |
| A108-d | 107 | 176 | 212 | 254 | 176 | 132 | 189 | 212 |
| A110-b | 107 | 152 | 188 | 206 | 176 | 126 | 189 | 221 |
| A110-c | 146 | 176 | 212 | 269 | 179 | 132 | 249 | 224 |
| A110-d | 146 | 176 | 212 | 269 | 179 | 132 | 249 | 224 |
| A111-a | 131 | 176 | 212 | 269 | 179 | 132 | 247 | 224 |
| A111-b | 107 | 152 | 188 | 206 | 179 | 126 | 247 | 221 |
| A113-a | 146 | 176 | 212 | 269 | 179 | 132 | 249 | 224 |
| A113-b | 146 | 176 | 212 | 269 | 179 | 132 | 249 | 224 |
| A115   | 107 | 176 | 212 | 254 | 176 | 132 | 189 | 212 |
| A120   | 161 | 152 | 194 | 269 | 179 | 132 | 185 | 239 |

***Ampelomyces* strains isolated from other powdery mildew species**

|       |     |     |     |     |     |     |     |     |
|-------|-----|-----|-----|-----|-----|-----|-----|-----|
| BV2   | 161 | 152 | 194 | 254 | 173 | 132 | 189 | 239 |
| BV4-b | 119 | 152 | 194 | 254 | 179 | 132 | 185 | 239 |
| BV4-c | 119 | 152 | 194 | 254 | 179 | 132 | 185 | 239 |
| RA1-b | 137 | 146 | 194 | 269 | 179 | 132 | 193 | 239 |
| RA2-a | 113 | 146 | 194 | 296 | 179 | 132 | 191 | 230 |
| RA2-d | 131 | 152 | 194 | 269 | 179 | 132 | 191 | 230 |
| MA5   | 134 | 146 | 194 | 257 | 179 | 132 | 189 | 239 |
| MA6-b | 134 | 146 | 194 | 254 | 179 | 132 | 187 | 239 |
| MA7-a | 134 | 146 | 194 | 257 | 179 | 132 | 189 | 239 |
| MA7-b | 134 | 146 | 194 | 257 | 179 | 132 | 189 | 239 |
| MA-H  | 134 | 146 | 194 | 254 | 179 | 132 | 187 | 239 |
| RS1-a | 128 | 152 | 194 | 239 | 179 | 132 | 189 | 239 |
| RS2-a | 128 | 152 | 194 | 239 | 179 | 132 | 189 | 239 |
| RS2-b | 128 | 152 | 194 | 239 | 179 | 132 | 189 | 239 |
| RS3-a | 128 | 152 | 194 | 239 | 179 | 132 | 189 | 239 |
| RS3-b | 128 | 152 | 194 | 239 | 179 | 132 | 189 | 239 |
| PN1-a | 143 | 152 | 194 | 266 | 179 | 132 | 187 | 239 |
| PN2   | 125 | 152 | 194 | 272 | 179 | 132 | 187 | 239 |
| PN3   | 125 | 152 | 194 | 272 | 179 | 132 | 189 | 236 |
| PN4-a | 125 | 152 | 194 | 272 | 179 | 132 | 189 | 236 |
| PN4-b | 125 | 152 | 194 | 272 | 179 | 132 | 189 | 236 |
| XL1-a | 122 | 176 | 203 | 263 | 176 | 132 | 187 | 221 |
| XL1-b | 122 | 176 | 203 | 263 | 176 | 132 | 187 | 221 |
| XL2-b | 161 | 176 | 212 | 257 | 179 | 132 | 201 | 221 |
| XL3-a | 161 | 176 | 212 | 257 | 179 | 132 | 201 | 221 |
| XL3-b | 161 | 176 | 212 | 257 | 179 | 132 | 201 | 221 |
| XL4-a | 161 | 176 | 212 | 257 | 179 | 132 | 201 | 221 |
| XL4-b | 161 | 176 | 179 | 257 | 179 | 132 | 201 | 221 |
| XL4-c | 161 | 176 | 212 | 257 | 179 | 132 | 201 | 221 |
| LV2-b | 125 | 152 | 194 | 242 | 176 | 132 | 189 | 236 |
| TP1   | 119 | 152 | 194 | 239 | 176 | 132 | 189 | 230 |
| TP3   | 161 | 152 | 194 | 272 | 176 | 132 | 189 | 239 |
| TP4   | 116 | 152 | 194 | 290 | 179 | 132 | 189 | 239 |
| TP5   | 125 | 152 | 194 | 242 | 179 | 132 | 189 | 239 |

|          |     |     |     |     |     |     |     |     |
|----------|-----|-----|-----|-----|-----|-----|-----|-----|
| TR1      | 119 | 146 | 194 | 272 | 179 | 132 | 189 | 239 |
| H14      | 119 | 152 | 194 | 239 | 176 | 132 | 189 | 230 |
| GS1      | 119 | 152 | 194 | 242 | 176 | 132 | 189 | 239 |
| GY-a     | 104 | 164 | 194 | 278 | 179 | 132 | 189 | 203 |
| GY-b     | 104 | 164 | 194 | 278 | 179 | 132 | 189 | 203 |
| GY-c     | 104 | 164 | 194 | 278 | 179 | 132 | 189 | 203 |
| GL       | 116 | 146 | 194 | 242 | 179 | 132 | 193 | 239 |
| ALA1-a   | 113 | 152 | 194 | 257 | 176 | 132 | 191 | 251 |
| Aq SA    | 116 | 152 | 194 | 269 | 170 | 132 | 191 | 245 |
| G2       | 113 | 152 | 194 | 281 | 179 | 132 | 189 | 230 |
| HMLAC226 | 113 | 152 | 194 | 239 | 176 | 132 | 193 | 221 |
| DSM 2222 | 119 | 152 | 194 | 239 | 176 | 132 | 189 | 230 |
| AQ10     | 125 | 158 | 194 | 245 | 182 | 132 | 193 | 242 |

**Powdery mildew-infected leaf samples, other than apple leaves, containing *Ampelomyces* pycnid**

|      |     |     |     |     |     |     |     |     |
|------|-----|-----|-----|-----|-----|-----|-----|-----|
| tp2  | 119 | 152 | 194 | 239 | 179 | 132 | 189 | 239 |
| tp13 | 119 | 152 | 194 | 239 | 176 | 132 | 189 | 230 |
| tp20 | 116 | 152 | 194 | 272 | 179 | 132 | 189 | 230 |
| tp21 | 119 | 152 | 194 | 242 | 179 | 132 | 189 | 239 |
| tp24 | 107 | 152 | 194 | 272 | 176 | 132 | 191 | 239 |
| tp25 | 128 | 152 | 194 | 302 | 179 | 132 | 189 | 239 |











**ia**
